# Supplementary material for: Thiophene/selenophene-based windmill-shaped triple [6]helicenes
Source: Royal Society of Chemistry journal article supplement (doi:10.1039/d2qo01208a), 2022-01-01
Supplement: d2qo01208a1.pdf [file d2qo01208a1.pdf]

## Supporting Information for

### Thiophene/Selenophene-Based Windmill-Shaped Triple

#### [6]Helicenes

Wan Xu, Jichang Wei, Kun Tang, Zhiying Ma, Jianwu Shi, Chunli Li\* and Hua Wang\*

Engineering Research Center for Nanomaterials, Henan University, Kaifeng, 475004, China

\*Corresponding author: Chunli Li (Email: chunli79@126.com); Hua Wang (Email: hwang@henu.edu.cn).

#### Table of Contents

|                                                                |     |
|----------------------------------------------------------------|-----|
| 1. Experimental Section .....                                  | S3  |
| General procedures and materials. ....                         | S3  |
| Synthesis of <b>3</b> . ....                                   | S4  |
| Synthesis of (TMS) <sub>2</sub> - <b>DTS</b> . ....            | S4  |
| Synthesis of <b>4b</b> . ....                                  | S4  |
| Synthesis of <b>5b</b> . ....                                  | S5  |
| Synthesis of <b>6a</b> . ....                                  | S5  |
| Synthesis of <b>6b</b> . ....                                  | S6  |
| Synthesis of <b>6c</b> . ....                                  | S6  |
| Synthesis of <b>6d</b> . ....                                  | S6  |
| Synthesis of <i>rac</i> - <b>1a</b> . ....                     | S7  |
| Synthesis of <i>rac</i> - <b>1b</b> . ....                     | S7  |
| Synthesis of <i>rac</i> - <b>1c</b> . ....                     | S8  |
| Synthesis of <i>rac</i> - <b>1d</b> . ....                     | S8  |
| 2. NMR and HRMS Spectra .....                                  | S8  |
| NMR and HRMS spectra of <b>3</b> . ....                        | S8  |
| NMR and HRMS spectra of (TMS) <sub>2</sub> - <b>DTS</b> . .... | S10 |
| NMR and HRMS spectra of <b>4b</b> . ....                       | S11 |

|                                                                           |     |
|---------------------------------------------------------------------------|-----|
| NMR and HRMS spectra of <b>5b</b> .....                                   | S13 |
| NMR and HRMS spectra of <b>6a</b> .....                                   | S14 |
| NMR and HRMS spectra of <b>6b</b> .....                                   | S16 |
| NMR and HRMS spectra of <b>6c</b> .....                                   | S17 |
| NMR and HRMS spectra of <b>6d</b> .....                                   | S18 |
| NMR and HRMS spectra of <i>rac-1a</i> .....                               | S19 |
| NMR and HRMS spectra of <i>rac-1b</i> .....                               | S20 |
| NMR and HRMS spectra of <i>rac-1c</i> .....                               | S22 |
| NMR and HRMS spectra of <i>rac-1d</i> .....                               | S23 |
| 3. Quantum Calculation of <i>rac-1(a)–(d)</i> .....                       | S25 |
| UV-vis spectra prediction and transition nature <i>rac-1(a)–(d)</i> ..... | S25 |
| 4. Resolution of <i>rac-1c</i> .....                                      | S27 |
| HPLC trace of (+)- <b>1c</b> , (–)- <b>1c</b> , and <i>rac-1c</i> .....   | S27 |
| Racemization of (–)- <b>1c</b> .....                                      | S27 |
| 5. X-ray Crystallographic Data.....                                       | S30 |
| X-ray crystallographic data of <i>rac-1a</i> .....                        | S30 |
| X-ray crystallographic data of <i>rac-1b</i> .....                        | S32 |
| X-ray crystallographic data of <i>rac-1c</i> .....                        | S34 |
| X-ray crystallographic data of <i>rac-1d</i> .....                        | S36 |
| 6. References.....                                                        | S41 |

## 1. Experimental Section

### General Procedures and Materials

Ether and tetrahydrofuran (THF) for use on vacuum line were freshly distilled from sodium/benzophenone prior to use. *t*-BuLi (pentane) and *n*-BuLi (hexane) were obtained from Energy Chemical, and their concentrations were determined by titration with *N*-pivaloyl-*o*-toluidine.<sup>1</sup> Column chromatography was carried out on silica gel (300–400 mesh). Analytical thin-layer chromatography was performed on glass plates of silica gel GF-254 with detection by UV. Standard techniques for synthesis under inert atmosphere, using gasbag and Schlenk glassware equipped with an 8 mm PTFE vacuum stopcock, were employed. All starting materials and reagents were commercially available.

<sup>1</sup>H NMR and <sup>13</sup>C NMR spectra were recorded on 300 or 400 or 600 MHz NMR instruments using CDCl<sub>3</sub> ( $\delta$  H (7.26 ppm) and CDCl<sub>3</sub>  $\delta$  C (77.00 ppm)) as solvent. IR spectra were obtained using an FT-IR instrument. HRMS analysis was carried out on a mass spectrometer equipped with EI<sup>+</sup>, DART-FTICR and DART-Positive. Melting point determination was taken on a Melt-Temp apparatus and was uncorrected. Ultraviolet-visible (UV-vis) absorption spectra were recorded on PE Lambda 950 equipment. The steady-state photoluminescence (PL) spectra and the fluorescence measurements for all samples were recorded on a JY HORIBA FluoroLog-3. CD spectrum was recorded on Aviv Biomedical Inc Model 420SF. Cyclic voltammetry (CV) behaviors were recorded on IM6eX equipment with three electrode cell in the solution of 0.1 M tetrabutylammonium hexafluorophosphate (Bu<sub>4</sub>NPF<sub>6</sub>) dissolved in CH<sub>2</sub>Cl<sub>2</sub>. Platinum electrode (0.6 cm<sup>2</sup>), Pt wire and Ag/AgCl electrode were used as the working electrode, counter electrode and reference electrode, respectively. The X-ray crystallographic analyses were performed using crystals of compounds *rac*-**1(a)**–**(d)** with sizes of 0.48 × 0.23 × 0.22, 0.17 × 0.09 × 0.04, 0.1611 × 0.1222 × 0.0669 and 0.1525 × 0.0577 × 0.0404 mm<sup>3</sup>, respectively. The intensity data were collected with the  $\omega$  scan mode (296, 298, 293, 293 K) on a diffractometer with CCD detector using Cu K $\alpha$  radiation ( $\lambda$  = 1.54178, 1.54184 Å). The data were corrected for Lorentz and polarization effects, and absorption corrections were performed using SADABS program.<sup>2</sup> The crystal structures were solved using the SHELXTL program and refined using full-matrix least-squares.<sup>3</sup> Further details were in the deposited CIF files. Slow evaporation of solutions of *rac*-**1(a)**–**(d)** in CHCl<sub>3</sub>/CH<sub>3</sub>OH (3/1, 2/1, 3/2, 1/1, v/v) were

employed for growing single crystals. The fluorescence quantum yields ( $\Phi_F$ ) of *rac*-**1(a)–(d)** were characterized in dichloromethane with quinine sulfate in 0.1 N H<sub>2</sub>SO<sub>4</sub> as the control. The predicted absorption spectra were computed within the TD-DFT/PCM approaches based on B3LYP/6-31G\* level. HOMO and LUMO distributions and isomerization barriers of *rac*-**1(a)–(d)** (i.e., the TMS replaced by hydrogen atom) were at the B3LYP/6-31G\* level.

#### **Synthesis of 2,7-Bis(trimethylsilyl)-[1,2]diselenino[3,4-b:6,5-b']dithiophene (3)**

*n*-BuLi (2.38 M in hexane, 6.12 mL, 14.56 mmol, 2.05 equiv) was added dropwise into a solution of **2** (3.10 g, 6.62 mmol) in Et<sub>2</sub>O (100 mL) at –78 °C, and then the reaction mixture was kept for 2 h. Dry Se (metals basis) (2.61 g, 33.1 mmol, 5.0 equiv) was added at –78 °C; the reaction mixture was kept at –78 °C for 2 h and –55 °C for 2 h, and then warmed up slowly to ambient temperature overnight. The reaction mixture was quenched with methanol at –78 °C, extracted with dichloromethane (3 × 25 mL), and then washed with water (3 × 30 mL). After drying over anhydrous MgSO<sub>4</sub>, the solvent was removed under vacuum. The residue was purified by column chromatography on silica gel with petrol ether (60–90 °C) as eluent to yield **3** (1.02 g, 33%) as a red solid. Mp: 137–138 °C. <sup>1</sup>H NMR (400 MHz, CDCl<sub>3</sub>)  $\delta$  7.30 (s, 2H), 0.35 (s, 18H). <sup>13</sup>C NMR (100 MHz, CDCl<sub>3</sub>)  $\delta$  142.3, 142.2, 132.3, 119.2, –0.1. HRMS (DART-Positive) *m/z* [M + H]<sup>+</sup> calcd for C<sub>14</sub>H<sub>21</sub>S<sub>2</sub>Se<sub>2</sub>Si<sub>2</sub> 468.8948; found 468.8950. IR (KBr): 3050, 2947, 1252, 986, 830 cm<sup>–1</sup>.

#### **Synthesis of 2,5-Bis(trimethylsilyl)dithieno[2,3-b:3',2'-d]selenophene((TMS)<sub>2</sub>-DTS)**

Compound **3** (300 mg, 0.64 mmol) and Cu nanopowder (200 mg, 3.22 mmol, 5.0 equiv) were heated to 145 °C without use of any solvent for 0.5 h. The residue was purified by column chromatography on silica gel with petrol ether (60–90 °C) as eluent to yield (TMS)<sub>2</sub>-**DTS** (120.7 mg, 50%) as a yellow liquid. <sup>1</sup>H NMR (300 MHz, CDCl<sub>3</sub>)  $\delta$  7.51 (s, 2H), 0.36 (s, 18H). <sup>13</sup>C NMR (100 MHz, CDCl<sub>3</sub>)  $\delta$  145.6, 141.6, 141.2, 126.4, 0.0. HRMS (DART-Positive) *m/z* [M + H]<sup>+</sup> calcd for C<sub>14</sub>H<sub>21</sub>SeS<sub>2</sub>Si<sub>2</sub> 388.9783; found 388.9785. IR (KBr): 3061, 2978, 1251, 963, 845 cm<sup>–1</sup>.

#### **Synthesis of 5-Bromo-2-(trimethylsilyl)dithieno[2,3-b:3',2'-d]selenophene (4b)**

(TMS)<sub>2</sub>-**DTS** (605 mg, 1.56 mmol) was dissolved in CHCl<sub>3</sub> (20 mL), and NBS (333 mg, 1.87 mmol, 1.2 equiv) was dissolved in 16 mL of HOAc/CHCl<sub>3</sub> (v/v = 1/8) and added dropwise under good stirring at 0 °C in an ice-water bath. After stirring for 2 h, the reaction mixture was quenched with H<sub>2</sub>O, extracted with dichloromethane (3 × 10 mL), and then washed with saturated NaHCO<sub>3</sub> (20

mL) and water (2 × 20 mL). The organic layer was dried over anhydrous MgSO<sub>4</sub>. After the solvent was removed under vacuum, the residue was washed with 3 × 5 mL hexane to yield **4b** (326.2 mg, 53%) as a yellow liquid. <sup>1</sup>H NMR (400 MHz, CDCl<sub>3</sub>) δ 7.44 (s, 1H), 7.41 (s, 1H), 0.37 (s, 9H). <sup>13</sup>C NMR (100 MHz, CDCl<sub>3</sub>) δ 146.3, 142.0, 140.7, 139.0, 134.7, 126.2, 123.5, 113.2, -0.1. HRMS (EI<sup>+</sup>) *m/z* [M<sup>+</sup>] calcd for C<sub>11</sub>H<sub>11</sub>BrS<sub>2</sub><sup>74</sup>SeSi 387.8480; found 387.8478. IR (KBr): 3084, 2963, 1259, 910, 842 cm<sup>-1</sup>.

**Synthesis of 5-(trimethylsilyl)dithieno[2,3-*b*:3',2'-*d*]selenophene-2-carbaldehyde (5b)**

*n*-BuLi (2.45 M in hexane, 0.98 mL, 2.40 mmol, 1.05 equiv) was added dropwise to **4b** (900 mg, 2.28 mmol) in THF (30 mL) at -78 °C. After 2 h at -78 °C, DMF (0.36 mL, 4.57 mmol, 2.0 equiv) was added at -78 °C and kept 0.5 h, and then the reaction mixture was warmed up slowly to ambient temperature overnight. The reaction mixture was quenched with H<sub>2</sub>O and extracted with dichloromethane (3 × 15 mL). The organic layer was washed with saturated NaHCO<sub>3</sub> (20 mL) and water (2 × 20 mL) and then dried over anhydrous MgSO<sub>4</sub>. The residue was purified by column chromatography on silica gel with petrol ether (60–90 °C) Hexane/CH<sub>2</sub>Cl<sub>2</sub> (v/v = 2/1) as eluent to yield **5b** (243 mg, 31%) as a brown solid. Mp: 124–125 °C. <sup>1</sup>H NMR (400 MHz, CDCl<sub>3</sub>) δ 9.89 (s, 1H), 8.01 (s, 1H), 7.54 (s, 1H), 0.39 (s, 9H). <sup>13</sup>C NMR (100 MHz, CDCl<sub>3</sub>) δ 182.3, 147.7, 147.5, 147.2, 141.9, 141.6, 140.0, 128.7, 126.1, -0.1. HRMS (DART-FTICR) *m/z* [M + H]<sup>+</sup> calcd for C<sub>12</sub>H<sub>13</sub>OS<sub>2</sub>SeSi 344.9337; found 344.9337. IR (KBr): 3091, 2938, 1656, 993, 849 cm<sup>-1</sup>.

**1,3,5-tris(2-(5-(trimethylsilyl)dithieno[2,3-*b*:3',2'-*d*]thiophene-2-yl)vinyl)benzene (6a)**

*n*-BuLi (2.5 M in hexane, 0.29 mL, 0.74 mmol, 3.5 equiv) was added dropwise into the phosphonium salt (241 mg, 0.21 mmol, 1.0 equiv) in THF at -78 °C for 2 h, then a solution of 5-(trimethylsilyl)dithieno[2,3-*b*:3',2'-*d*]thiophene-2-carbaldehyde **5a** (200 mg, 0.67 mmol, 3.2 equiv) in dry THF (5 mL) was added at -78 °C. After keeping stirring for 2 h, the reaction mixture was warmed up slowly to ambient temperature overnight. The reaction was quenched with water at -78 °C, extracted with dichloromethane (3 × 15 mL), washed with H<sub>2</sub>O (3 × 25 mL), and then dried over anhydrous MgSO<sub>4</sub>. After the solvent was removed in vacuum, the residue was purified by column chromatography on silica gel with petroleum ether (60–90 °C) Hexane/CH<sub>2</sub>Cl<sub>2</sub>(v/v = 1/1) as eluent to give 1,3,5-tris(2-(5-(trimethylsilyl)dithieno[2,3-*b*:3',2'-*d*]thiophene-2-yl)vinyl)-benzene **6a** (100.3 mg, 50%) as a yellow solid. Mp: 157–159 °C. <sup>1</sup>H NMR (400 MHz, CDCl<sub>3</sub>) δ

7.45 (s, 6H), 7.32 (t,  $J = 8.0$  Hz, 6H), 6.91 (d,  $J = 16.0$  Hz, 3H), 0.40 (s, 27H).  $^{13}\text{C}$  NMR (100 MHz,  $\text{CDCl}_3$ )  $\delta$  145.2, 144.6, 143.7, 140.6, 138.4, 137.8, 137.5, 127.4, 124.9, 123.5, 123.0, 118.1,  $-0.1$ . HRMS (MALDI MS  $\text{EI}^+$ )  $m/z$  [ $\text{M}^+$ ] calcd for  $\text{C}_{45}\text{H}_{42}\text{S}_9\text{Si}_3$  954.0081; found 954.0075. IR (KBr) 3017, 2955, 1259, 941, 833  $\text{cm}^{-1}$ .

***1,3,5-tris(2-(5-(trimethylsilyl)dithieno[2,3-*b*:3',2'-*d*]selenophene-2-yl)vinyl)benzene (6b)***

Compound **6b** was synthesized according to the procedure for making **6a**. From the reaction on the 200 mg scale of **5b**, 27.9 mg (14%) of **6b** was obtained as yellow solid. Mp:  $>300$  °C.  $^1\text{H}$  NMR (400 MHz,  $\text{CDCl}_3$ ) (for a mixture of *cis* and *trans* isomers of **6b**)  $\delta$  7.51 (d,  $J = 8.0$  Hz), 7.49 (d,  $J = 6.0$  Hz), 7.45 (d,  $J = 1.6$  Hz), 7.39 (d,  $J = 7.2$  Hz), 7.33(s), 7.27(s), 6.97 (s), 6.93 (t,  $J = 8.0$  Hz), 6.83 (d,  $J = 8.0$  Hz), 6.63 (d,  $J = 12.0$  Hz), 0.39 (s), 0.38 (s), 0.33 (s); the ratio of integral areas of the peaks are 1 : 1 : 0.5 : 1.5 : 0.5 : 0.5 : 0.5 : 1 : 0.3 : 0.3 : 7 : 3 : 1. HRMS (AP-MALDI- Positive)  $m/z$  [ $\text{M}^+$ ] calcd for  $\text{C}_{45}\text{H}_{42}\text{S}_6^{80}\text{Se}_3\text{Si}_3$  1097.8409; found 1097.8435. IR (KBr) 3029, 2954, 1259, 941, 834  $\text{cm}^{-1}$ .

***1,3,5-tris(2-(5-(trimethylsilyl)diseleno[2,3-*b*:3',2'-*d*]thiophene-2-yl)vinyl)benzene (6c)***

Compound **6c** was synthesized according to the procedure for making **6a**. From the reaction on the 200 mg scale of **5c**, 21.7 mg (11%) of **6c** was obtained as yellow solid. Mp: 258–260 °C.  $^1\text{H}$  NMR (400 MHz,  $\text{CDCl}_3$ ) (for a mixture of *cis* and *trans* isomers of **6c**)  $\delta$  7.74 (s), 7.71 (d,  $J = 4.4$  Hz), 7.56 (d,  $J = 6.0$  Hz), 7.49 (d,  $J = 3.6$  Hz), 7.43 (d,  $J = 11.2$  Hz), 7.37 (d,  $J = 7.2$  Hz), 6.93 (d,  $J = 11.6$  Hz), 6.83 (d,  $J = 6.0$  Hz), 6.79 (d,  $J = 6.0$  Hz), 6.66 (d,  $J = 10.8$  Hz), 0.39 (s), 0.38 (s), 0.35 (s); the ratio of integral areas of the peaks are 1 : 0.5 : 1 : 1 : 1 : 1 : 0.15 : 0.85 : 0.85 : 0.15 : 9 : 3 : 3. HRMS (AP-MALDI-Positive)  $m/z$  [ $\text{M}^+$ ] calcd for  $\text{C}_{45}\text{H}_{42}\text{S}_3^{80}\text{Se}_6\text{Si}_3$  1241.6742; found 1241.6768. IR (KBr) 3015, 2950, 1245, 908, 833  $\text{cm}^{-1}$ .

***1,3,5-tris(2-(5-(trimethylsilyl)diseleno[2,3-*b*:3',2'-*d*]selenophene-2-yl)vinyl)benzene (6d)***

Compound **6d** was synthesized according to the procedure for making **6a**. From the reaction on the 200 mg scale of **5d**, 19.7 mg (10%) of **6d** was obtained as yellow solid. Mp: 280–282 °C.  $^1\text{H}$  NMR (400 MHz,  $\text{CDCl}_3$ ) (for a mixture of *cis* and *trans* isomers of **6d**)  $\delta$  7.76 (s), 7.74 (d,  $J = 4.0$  Hz), 7.59 (d,  $J = 6.0$  Hz), 7.53 (d,  $J = 11.6$  Hz), 7.48 (s), 7.43 (d,  $J = 10.4$  Hz), 7.38 (d,  $J = 4.4$  Hz), 7.33(s), 6.93 (d,  $J = 11.6$  Hz), 6.83 (d,  $J = 4.8$  Hz), 6.79 (d,  $J = 4.4$  Hz), 6.65 (d,  $J = 11.6$  Hz), 0.39 (s), 0.37 (s), 0.35 (s); the ratio of integral areas of the peaks are 1 : 1 : 1 : 1 : 1 : 1 : 0.7 : 0.3 : 0.3 :

0.7 : 0.7 : 0.3 : 9 : 6 : 3. HRMS (AP-MALDI-Positive)  $m/z$  [ $M^+$ ] calcd for  $C_{45}H_{42}^{80}Se_9Si_3$  1385.5076; found 1385.5099. IR (KBr) 3010, 2950, 1245, 911, 832  $cm^{-1}$ .

***1,3,5-tris(trimethylsilyl)benzo[1,2-b:3,4-b']-tris(dithieno[2,3-b:3',2'-d]thiophene)benzene (rac-1a)***

Iodine (22 mg, 0.088 mmol, 3.0 equiv) and 2-methyloxirane (0.1 mL) were added into solution of **6a** (28 mg, 0.029 mmol) in dry toluene (25 mL). The reaction solution was irradiated with a 450 W unfiltered Hg medium pressure lamp. The reaction was monitored by thin layer chromatography every hour, and irradiation was stopped when the **6a** was consumed. The reaction was quenched with saturated  $Na_2S_2O_3$  (10 mL). The reaction mixture was extracted with dichloromethane ( $3 \times 10$  mL) and washed with  $H_2O$  ( $3 \times 10$  mL) and then dried over anhydrous  $MgSO_4$ . After the solvent was removed in vacuum, the crude product was purified by PTLC with petroleum ether (60–90 °C) Hexane/ $CH_2Cl_2$  (v/v = 2/1) as developer to yield **rac-1a** (10.0 mg, 35%) as a light yellow solid. Mp: 258–260 °C.  $^1H$  NMR (400 MHz,  $CDCl_3$ )  $\delta$  8.47 (d,  $J$  = 8.8 Hz, 3H), 7.77 (d,  $J$  = 8.8 Hz, 3H), 6.53 (s, 3H), 0.10 (s, 27H).  $^{13}C$  NMR (100 MHz,  $CDCl_3$ )  $\delta$  143.1, 143.0, 142.0, 141.6, 141.6, 135.1, 130.2, 127.6, 127.5, 127.2, 126.6, 119.2, –0.3. HRMS (MALDI MS  $EI^+$ )  $m/z$  [ $M^+$ ] calcd for  $C_{45}H_{36}S_9Si_3$  947.9611, found 947.9606. IR (KBr) 3074, 2953, 2920, 1253, 979, 838  $cm^{-1}$ .

***1,3,5-tris(trimethylsilyl)benzo[1,2-b:3,4-b']-tris(dithieno[2,3-b:3',2'-d]selenophene)benzene (rac-1b)***

**Rac-1b** was synthesized according to the procedure for making **rac-1a**. From the reaction on the 32.5 mg scale of **6b**, 6.5 mg (20%) of **rac-1b** was obtained as yellow solid. Mp: > 300 °C.  $^1H$  NMR (400 MHz,  $CDCl_3$ )  $\delta$  8.35 (d,  $J$  = 8.8 Hz, 3H), 7.72 (d,  $J$  = 8.4 Hz, 3H), 6.51 (s, 3H), 0.02 (s, 27H).  $^{13}C$  NMR (125 MHz,  $CDCl_3$ )  $\delta$  144.2, 143.5, 142.4, 140.5, 140.2, 136.7, 131.8, 128.3, 127.9, 127.6, 126.9, 118.8, –0.4. HRMS (AP-MALDI-Positive)  $m/z$  [ $M^+$ ] calcd for  $C_{45}H_{36}S_6Se_3Si_3$  1091.7049; found 1091.7936. IR (KBr) 3061, 2963, 1265, 970, 834  $cm^{-1}$ .

***1,3,5-tris(trimethylsilyl)benzo[1,2-b:3,4-b']-tris(diseleno[2,3-b:3',2'-d]thiophene)benzene (rac-1c)***

**Rac-1c** was synthesized according to the procedure for making **rac-1a**. From the reaction on the 35.5 mg scale of **6c**, 3.5 mg (10%) of **rac-1c** was obtained as yellow solid. Mp: 290–292 °C.  $^1H$  NMR (400 MHz,  $CDCl_3$ )  $\delta$  8.27 (d,  $J$  = 8.8 Hz, 3H), 7.69 (d,  $J$  = 8.8 Hz, 3H), 6.68 (s, 3H), –0.05

(s, 27H).  $^{13}\text{C}$  NMR (150 MHz,  $\text{CDCl}_3$ )  $\delta$  147.2, 145.4, 144.7, 142.8, 139.3, 139.2, 132.7, 129.4, 128.8, 128.7, 126.6, 122.0, -0.2. HRMS (DART-Positive)  $m/z$  [ $\text{M}^+$ ] calcd for  $\text{C}_{45}\text{H}_{36}\text{S}_3\text{Se}_6\text{Si}_3$  1235.6278; found 1235.6322. IR (KBr) 3080, 2957, 1251, 944, 833  $\text{cm}^{-1}$ .

***1,3,5-tris(trimethylsilyl)benzo[1,2-b:3,4-b']-tris(diseleno[2,3-b:3',2'-d]selenophene)benzene***  
**(*rac-1d*)**

*Rac-1d* was synthesized according to the procedure for making *rac-1a*. From the reaction on the 37.3 mg scale of **6d**, 3.0 mg (8%) of *rac-1d* was obtained as yellow solid. Mp:  $>300$   $^\circ\text{C}$ .  $^1\text{H}$  NMR (400 MHz,  $\text{CDCl}_3$ )  $\delta$  8.15 (d,  $J = 8.4$  Hz, 3H), 7.65 (d,  $J = 8.4$  Hz, 3H), 6.71 (s, 3H), -0.16 (s, 27H).  $^{13}\text{C}$  NMR (150 MHz,  $\text{CDCl}_3$ )  $\delta$  148.4, 146.9, 145.8, 141.2, 141.2, 138.6, 133.9, 130.5, 128.9, 128.4, 126.5, 121.6, -0.4. HRMS (DART-Positive)  $m/z$  [ $\text{M}^+$ ] calcd for  $\text{C}_{45}\text{H}_{36}\text{Se}_9\text{Si}_3$  1379.4612; found 1379.4645. IR (KBr) 3070, 2950, 1251, 935, 833  $\text{cm}^{-1}$ .

## 2. NMR and HRMS Spectra

### NMR and HRMS spectra of **3**

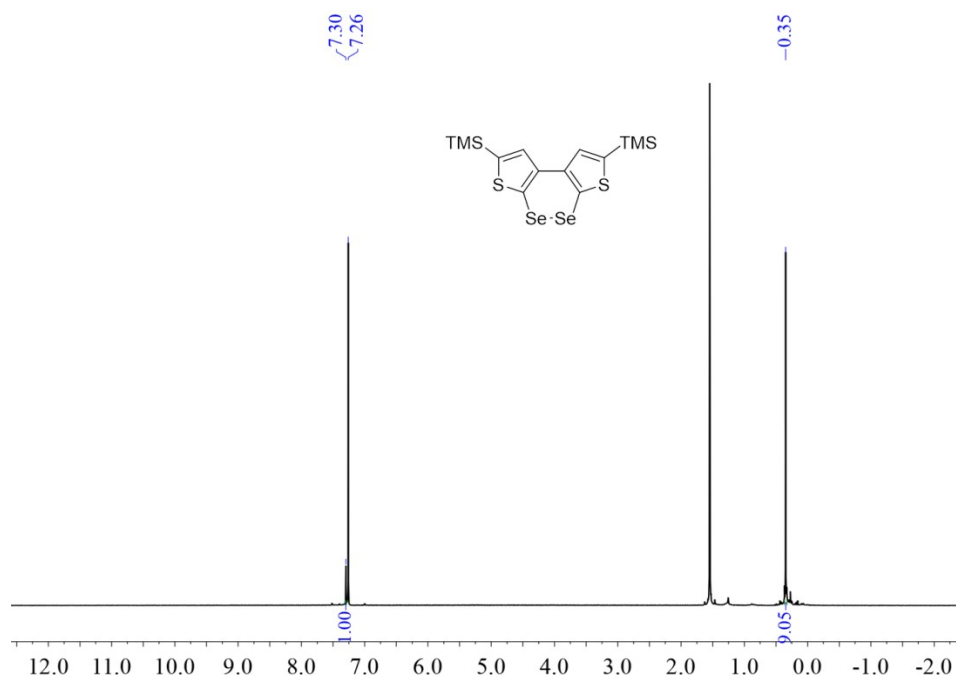

**Fig. S1.**  $^1\text{H}$  NMR (400 MHz,  $\text{CDCl}_3$ ) spectrum of **3**



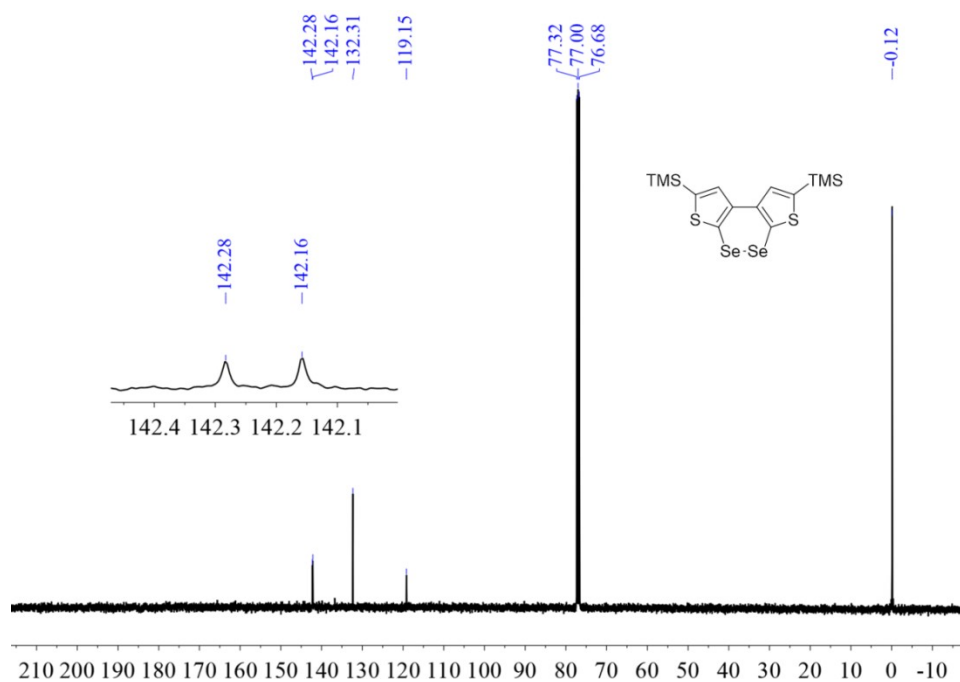

Fig. S2.  $^{13}\text{C}$  NMR (100 MHz,  $\text{CDCl}_3$ ) spectra of **3**

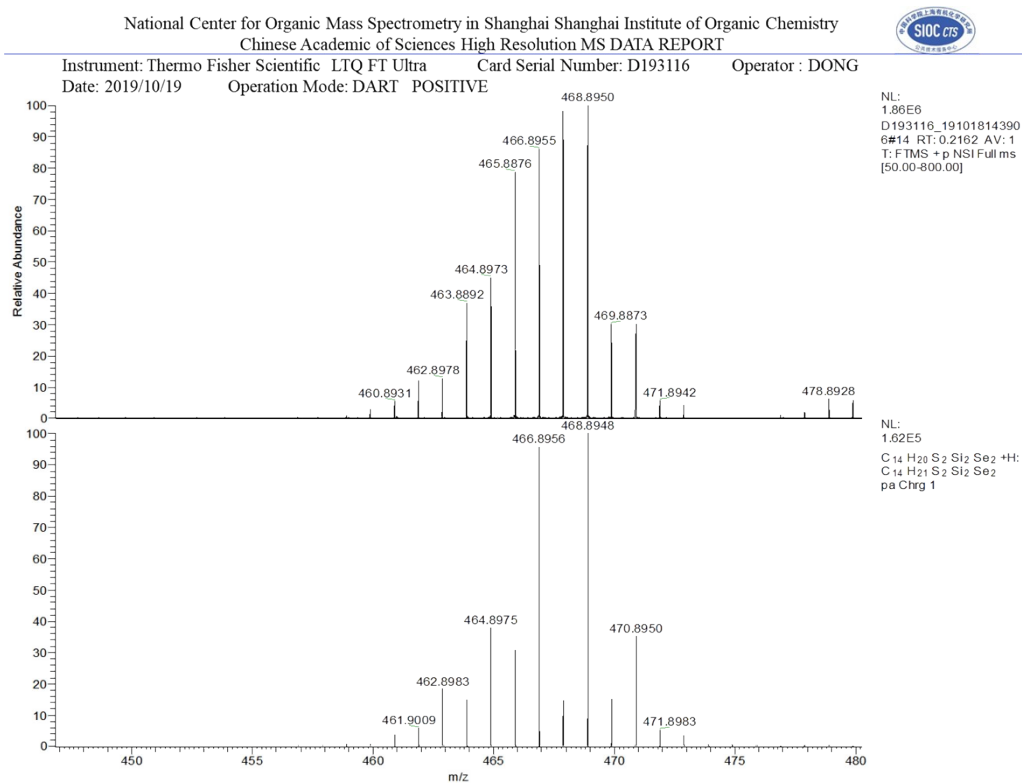

Fig. S3. HRMS spectra of **3**

**NMR and HRMS spectra of ((TMS)<sub>2</sub>-DTS)**

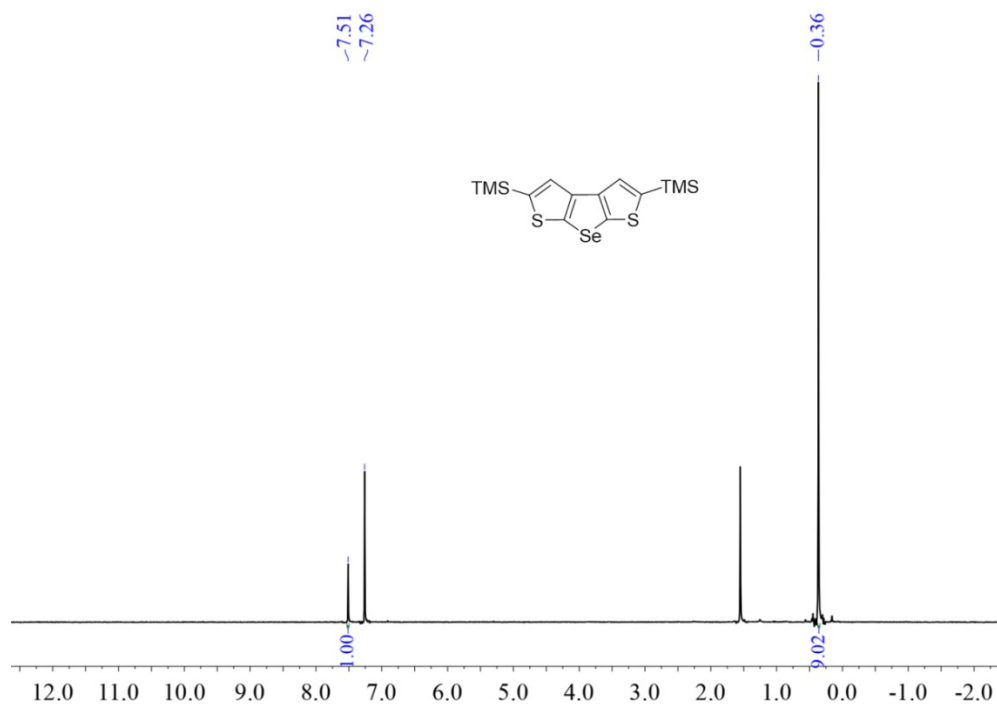

**Fig. S4.** <sup>1</sup>H NMR (300 MHz, CDCl<sub>3</sub>) spectrum of ((TMS)<sub>2</sub>-DTS)

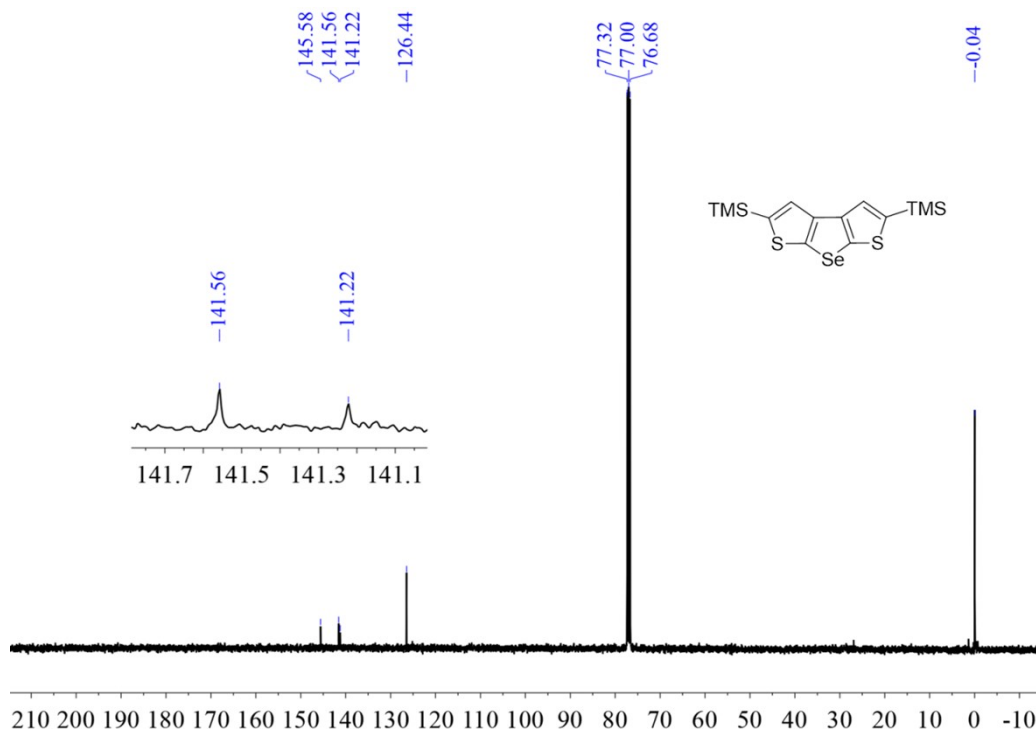

**Fig. S5.** <sup>13</sup>C NMR (100 MHz, CDCl<sub>3</sub>) spectra of ((TMS)<sub>2</sub>-DTS)

Instrument: Thermo Fisher Scientific LTQ FT Ultra Card Serial Number: D193118 Operator: DONG  
Date: 2019/10/19 Operation Mode: DART POSITIVE

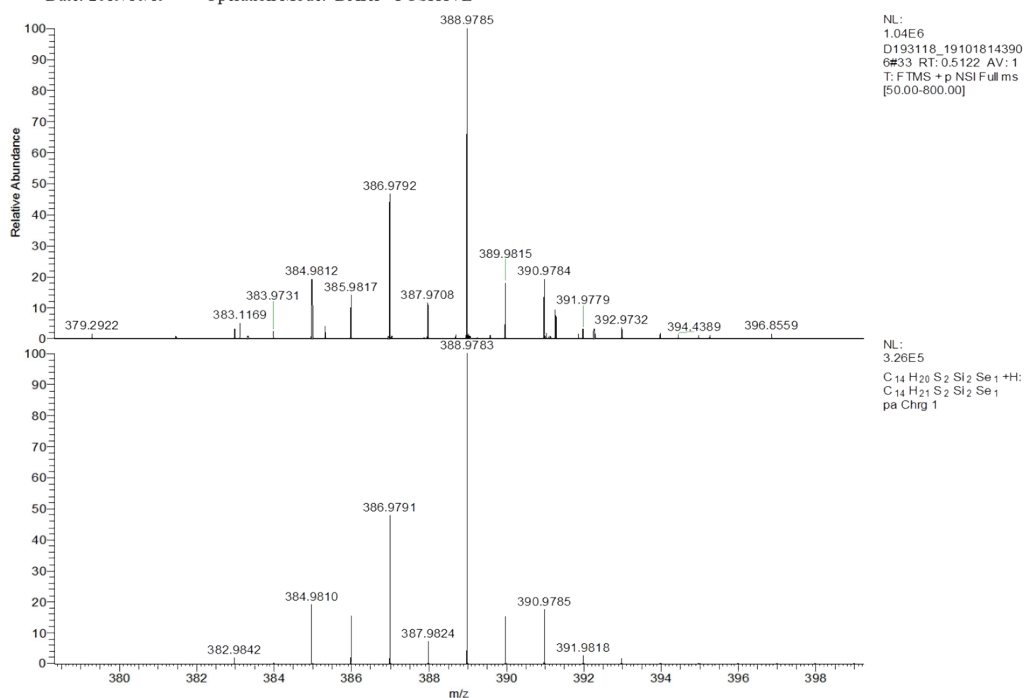

Fig. S6. HRMS spectra of ((TMS)<sub>2</sub>-DTS)

### NMR and HRMS spectra of 4b

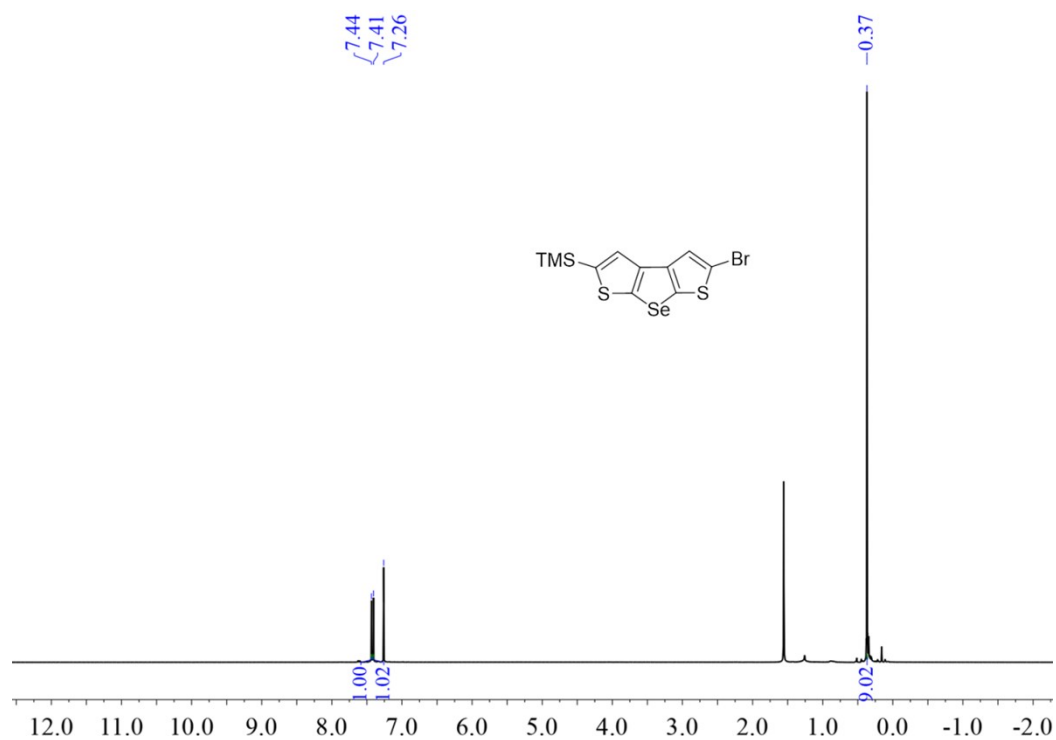

Fig. S7. <sup>1</sup>H NMR (400 MHz, CDCl<sub>3</sub>) spectrum of 4b

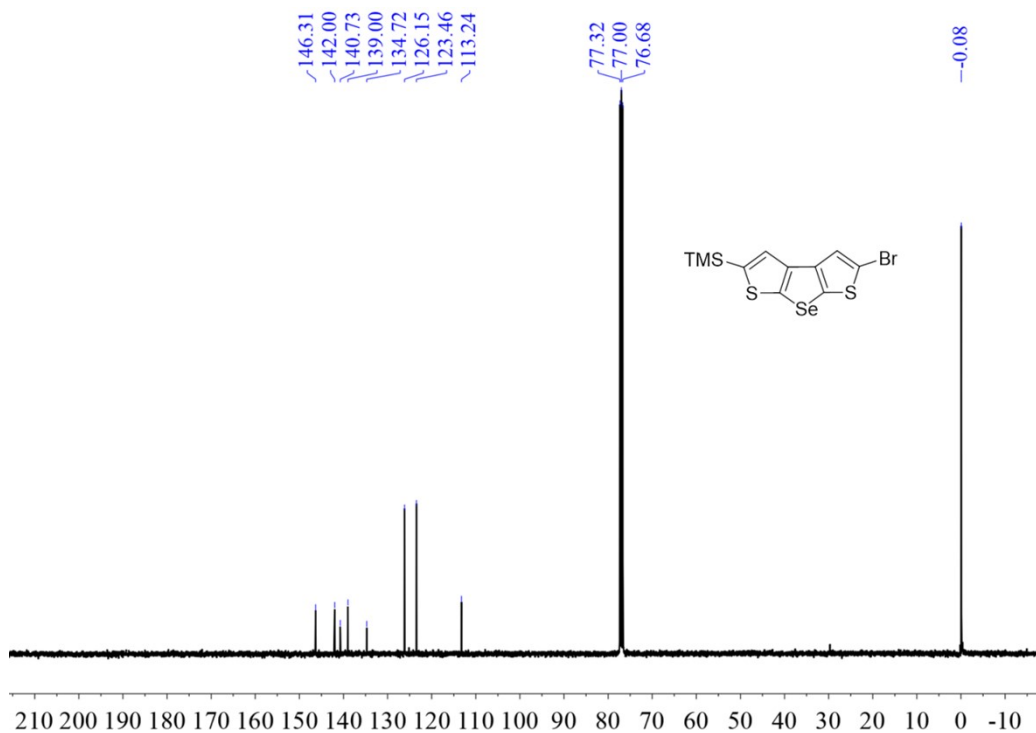

Fig. S8.  $^{13}\text{C}$  NMR (100 MHz,  $\text{CDCl}_3$ ) spectrum of **4b**

National Center for Organic Mass Spectrometry in Shanghai  
 Shanghai Institute of Organic Chemistry  
 Chinese Academic of Sciences High Resolution MS Data Report

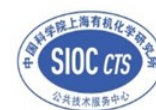

Instrument: Waters Micromass GCT Premier      Ionisation Mode:  $\text{EI}^+$   
 Electron Energy: 70eV      Card Serial Number: GCT-P-T19-OS-866  
 Operator: Li      Date: 2019/11/18

| Mass     | Calc. Mass | mDa  | PPM  | DBE  | i-FIT     | Formula                                                     |
|----------|------------|------|------|------|-----------|-------------------------------------------------------------|
| 387.8478 | 387.8480   | -0.2 | -0.5 | 8.0  | 5546026.5 | $\text{C}_{11}\text{H}_{11}\text{SiS}_2\text{74SeBr}$       |
|          | 387.8473   | 0.5  | 1.3  | 9.0  | 5546026.5 | $\text{C}_{11}\text{H}_7\text{O}_4\text{S}_7\text{4SeBr}$   |
|          | 387.8472   | 0.6  | 1.5  | 19.0 | 5546025.5 | $\text{C}_{18}\text{HSiS}_2\text{Br}$                       |
|          | 387.8466   | 1.2  | 3.1  | 18.5 | 5546026.5 | $\text{C}_{17}\text{HNO}_7\text{4SeBr}$                     |
|          | 387.8498   | -2.0 | -5.2 | 13.5 | 5546026.5 | $\text{C}_{13}\text{H}_5\text{NO}_2\text{Si}_7\text{4SeBr}$ |

Fig. S9. HRMS data of **4b**

### NMR and HRMS spectra of **5b**

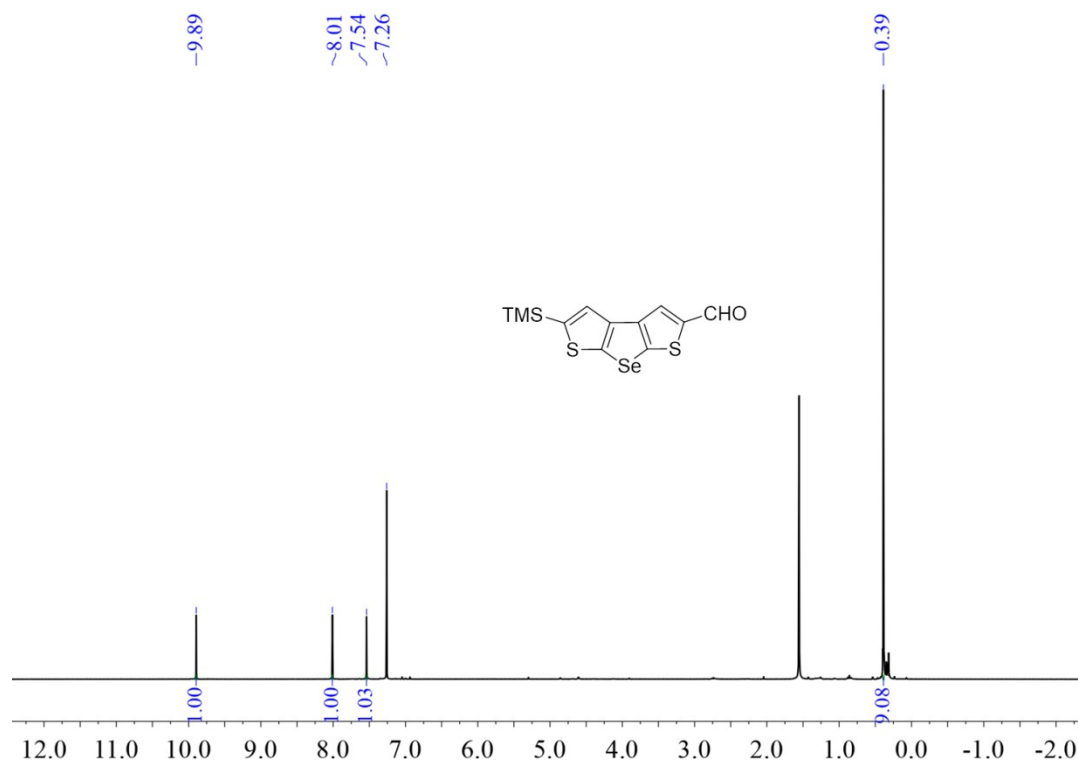

**Fig. S10.** <sup>1</sup>H NMR (400 MHz, CDCl<sub>3</sub>) spectrum of **5b**

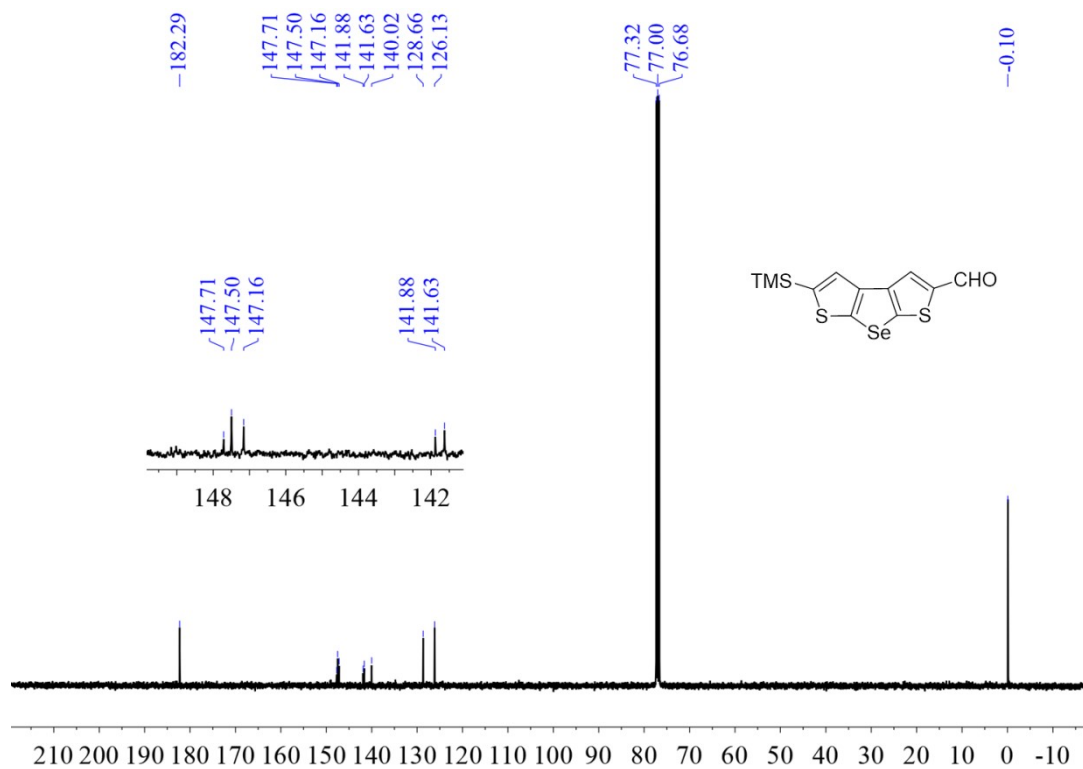

**Fig. S11.** <sup>13</sup>C NMR (100 MHz, CDCl<sub>3</sub>) spectra of **5b**

Instrument: Thermo Fisher Scientific LTQ FT Ultra Card Serial Number: D193122 Operator: DONG  
Date: 2019/10/19 Operation Mode: DART POSITIVE

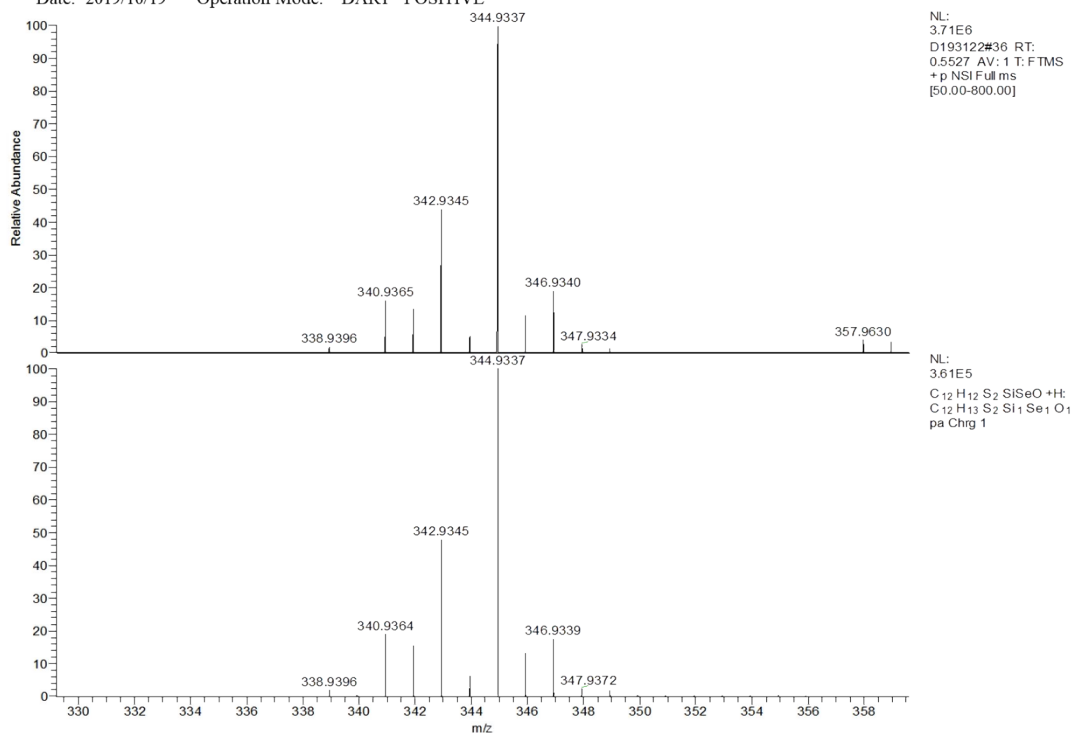

Fig. S12. HRMS spectra of 5b

### NMR and HRMS spectra of 6a

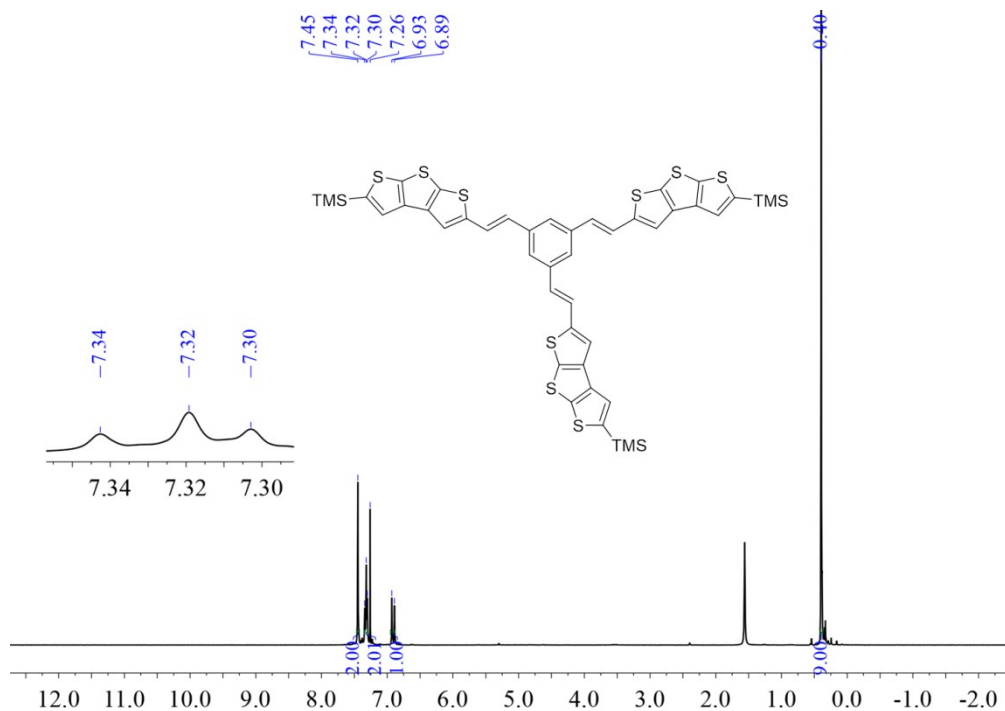

Fig. S13. <sup>1</sup>H NMR (400 MHz, CDCl<sub>3</sub>) spectra of 6a

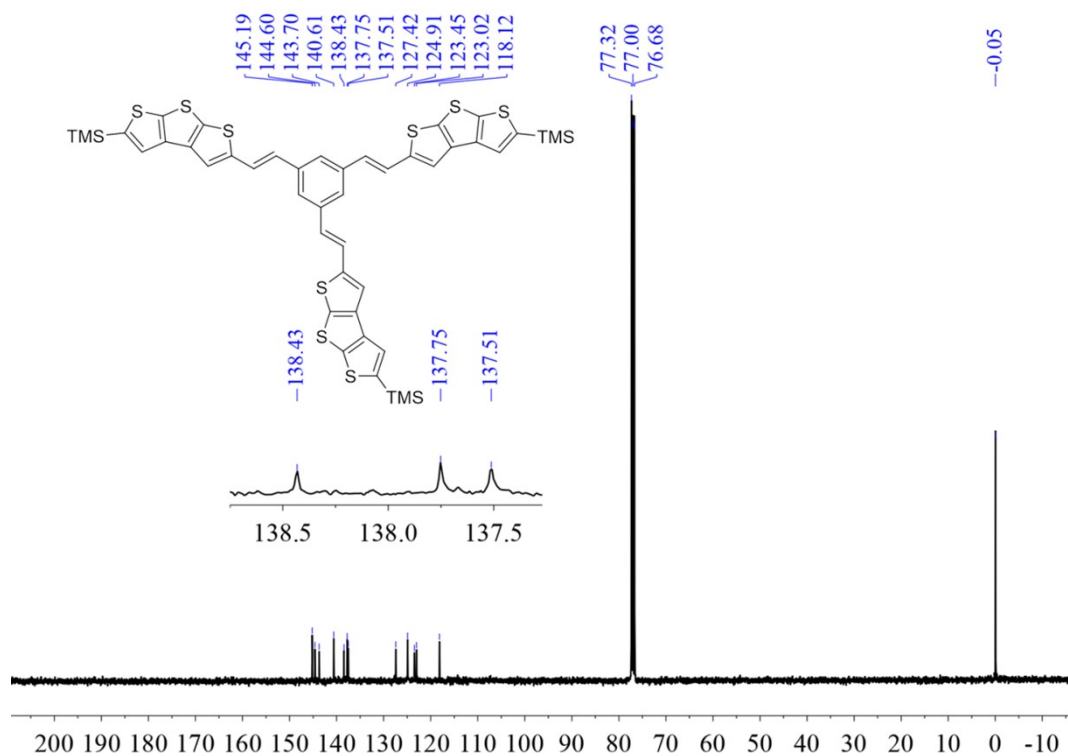

Fig. S14.  $^{13}\text{C}$  NMR (100 MHz,  $\text{CDCl}_3$ ) spectra of **6a**

Shanghai Mass Spectrometry Center  
Shanghai Institute of Organic Chemistry  
Chinese Academic of Sciences  
High Resolution MS DATA REPORT

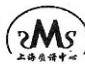

Instrument: IonSpec 4.7 Tesla FTMS

Card Serial Number : WI14 426

Sample Serial Number: WJC-4-187-COL

Operator : HuaQin Date: 2014/02/21

Operation Mode: MALDI/DHB

**Elemental Composition Search Report:**

**Target Mass:**  
Target  $m/z$  =  $954.0075 \pm 0.004$   
Charge = +1

**Possible Elements:**

| Element: | Exact Mass: | Min: | Max: |
|----------|-------------|------|------|
| C        | 12.000000   | 0    | 100  |
| H        | 1.007825    | 0    | 100  |
| S        | 31.972071   | 0    | 10   |
| Si       | 27.976927   | 0    | 3    |

**Additional Search Restrictions:**

DBE Limit Mode = Both Integer and Half-Integer  
Minimum DBE = 0

**Search Results:**

Number of Hits = 5

| $m/z$     | Delta $m/z$ | DBE  | Formula                                                   |
|-----------|-------------|------|-----------------------------------------------------------|
| 954.00752 | -0.00002    | 25.0 | $\text{C}_{45}\text{H}_{42}\text{S}_9\text{Si}_3^{+1}$    |
| 954.00888 | -0.00138    | 52.0 | $\text{C}_{62}\text{H}_{22}\text{S}_9\text{Si}^{+1}$      |
| 954.00551 | 0.00199     | 57.0 | $\text{C}_{65}\text{H}_{18}\text{S}_4\text{Si}^{+1}$      |
| 954.00415 | 0.00335     | 30.0 | $\text{C}_{48}\text{H}_{38}\text{S}_8\text{Si}_3^{+1}$    |
| 954.01089 | -0.00339    | 20.0 | $\text{C}_{42}\text{H}_{46}\text{S}_{10}\text{Si}_3^{+1}$ |

Fig. S15. HRMS data of **6a**

## NMR and HRMS spectra of 6b

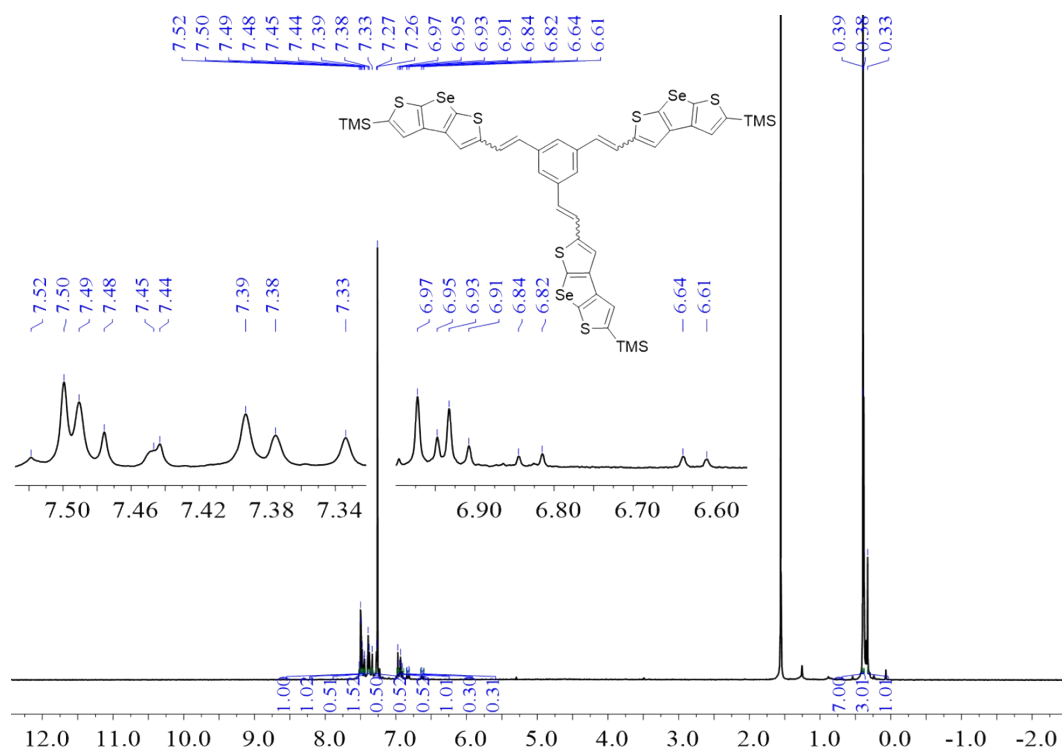

**Fig. S16.** <sup>1</sup>H NMR (400 MHz, CDCl<sub>3</sub>) spectra of **6b**

National Center for Organic Mass Spectrometry in Shanghai Shanghai Institute of Organic Chemistry  
Chinese Academic of Sciences High Resolution MS DATA REPORT

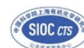

Instrument: Thermo Scientific Q Exactive HF Orbitrap-FTMS Card Serial Number: H-W190996 Operator : QHL  
Date: 2019/11/1 Operation Mode: AP- MALDI Positive Ion Mode

Elemental composition search on mass 1097.8435

m/z = 1092.8435-1102.8435

| m/z       | Theo. Mass | Delta (ppm) | RDB equiv. | Composition                                                                    |
|-----------|------------|-------------|------------|--------------------------------------------------------------------------------|
| 1097.8435 | 1097.8409  | 2.40        | 28.0       | C <sub>45</sub> H <sub>42</sub> S <sub>6</sub> Se <sub>3</sub> Si <sub>3</sub> |

XV-Se-w-s #267 RT: 1.52 AV: 1 NL: 1.44E4  
T: FTMS + p NSI Full ms [400.0000-1500.0000]

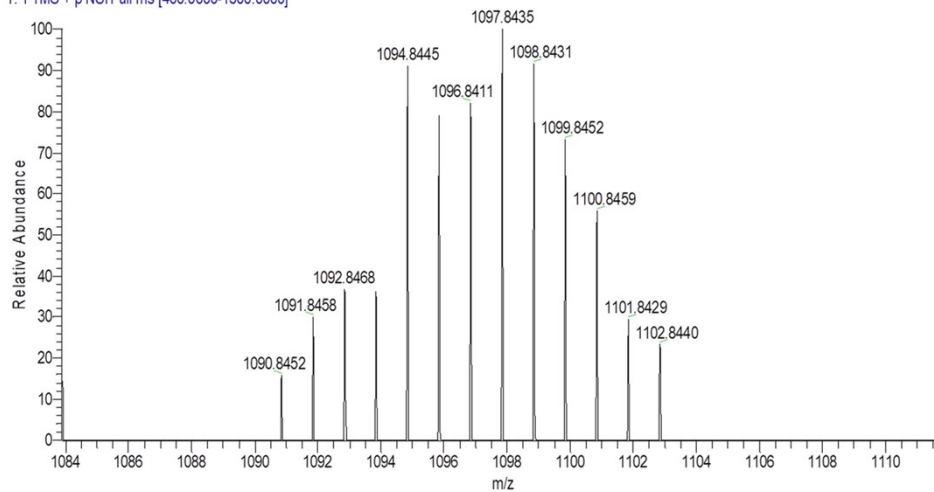

**Fig. S17.** HRMS spectrum of **6b**



### NMR and HRMS spectra of 6c

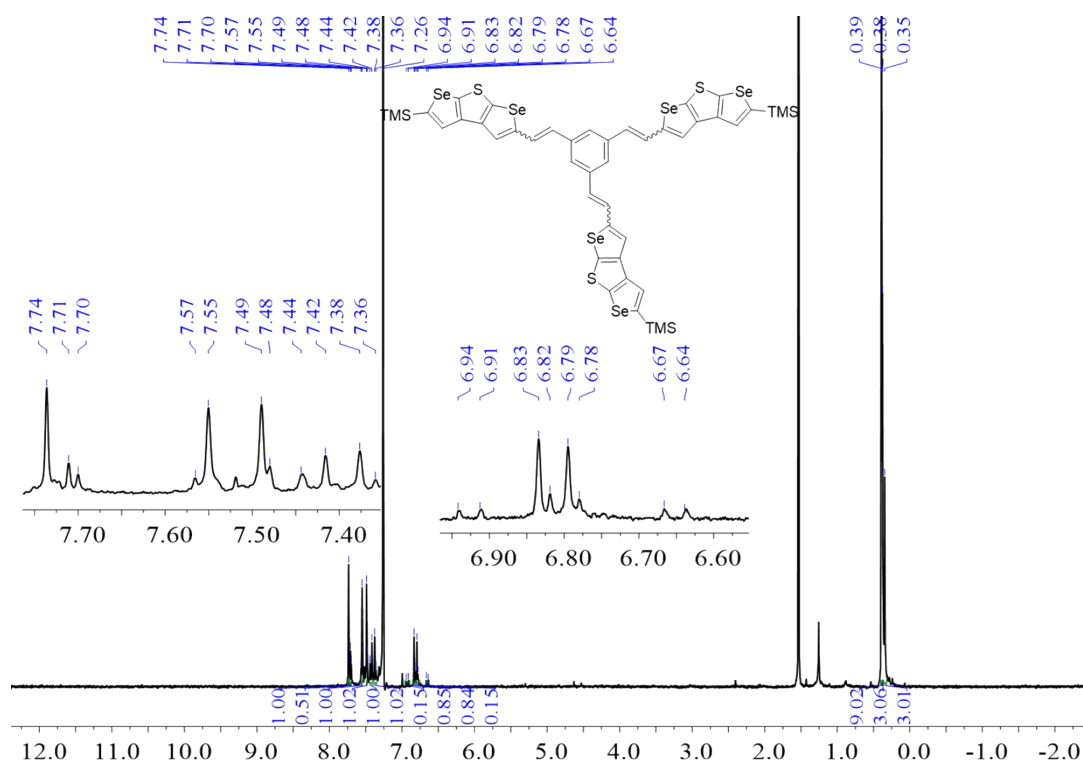

**Fig. S18.**  $^1\text{H}$  NMR (400 MHz,  $\text{CDCl}_3$ ) spectra of **6c**

National Center for Organic Mass Spectrometry in Shanghai Shanghai Institute of Organic Chemistry  
Chinese Academic of Sciences High Resolution MS DATA REPORT

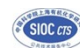

Instrument: Thermo Scientific Q Exactive HF Orbitrap-FTMS Card Serial Number: H-W190994 Operator : QHL  
Date: 2019/11/1 Operation Mode: AP- MALDI Positive Ion Mode

Elemental composition search on mass 1241.6768

$m/z = 1236.6768 - 1246.6768$

| $m/z$     | Theo. Mass | Delta (ppm) | RDB equiv. | Composition                                                  |
|-----------|------------|-------------|------------|--------------------------------------------------------------|
| 1241.6768 | 1241.6742  | 2.04        | 28.0       | $\text{C}_{45}\text{H}_{42}\text{S}_3\text{Se}_6\text{Si}_3$ |

XW-2Se-w-s\_20191029163053 #82 RT: 0.50 AV: 1 NL: 9.80E3  
T: FTMS + p NSI Full ms [400.0000-1500.0000]

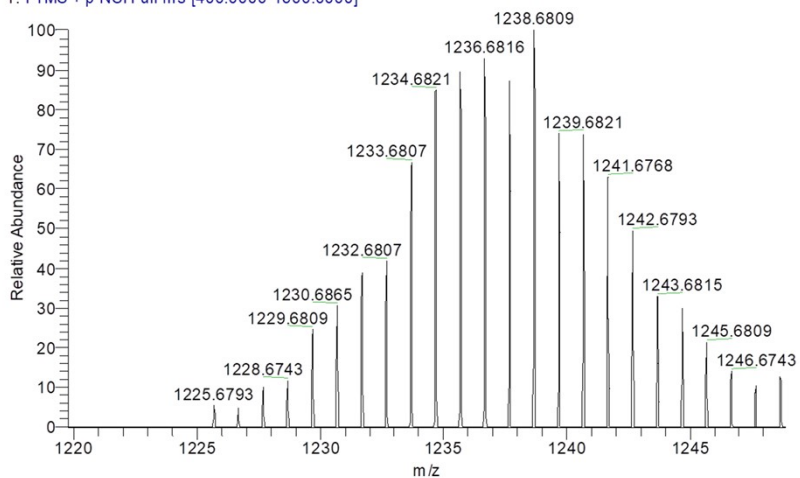

**Fig. S19.** HRMS spectrum of **6c**

## NMR and HRMS spectra of 6d

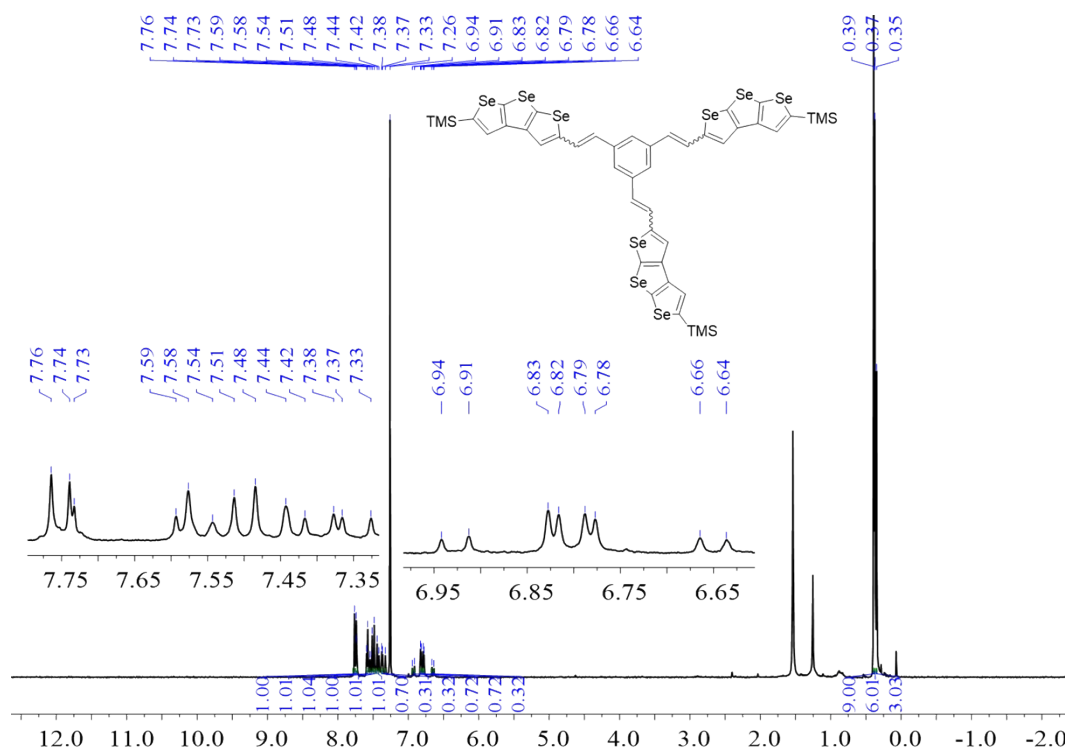

**Fig. S20.** <sup>1</sup>H NMR (400 MHz, CDCl<sub>3</sub>) spectra of **6d**

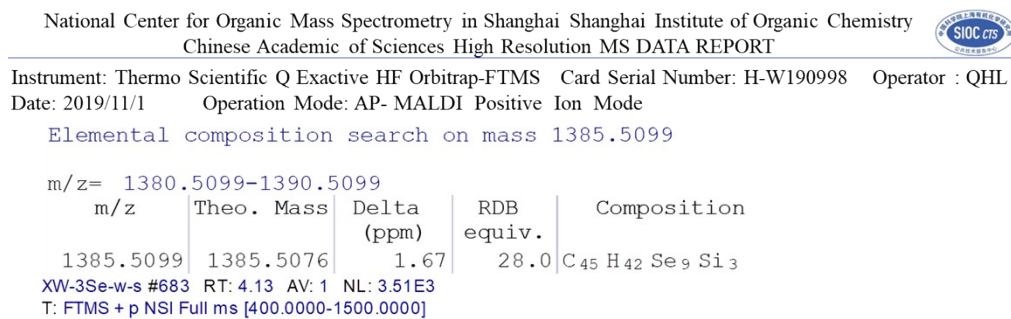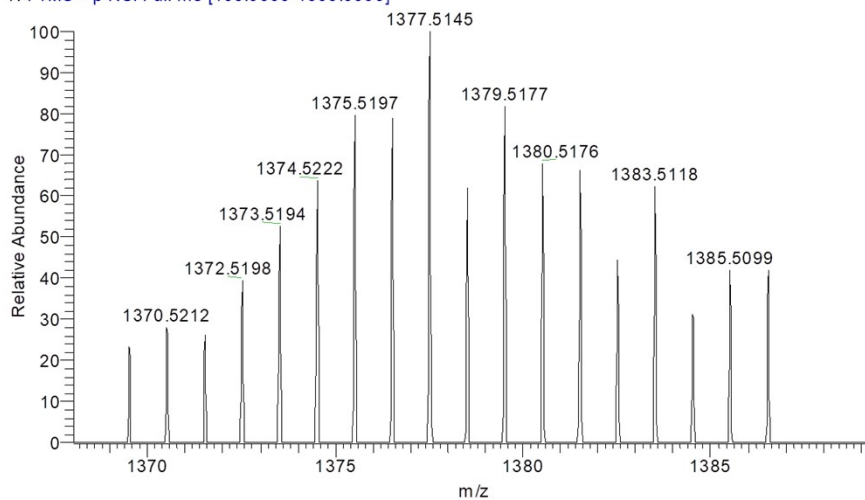

**Fig. S21.** HRMS spectrum of **6d**

NMR and HRMS spectra of *rac-1a*

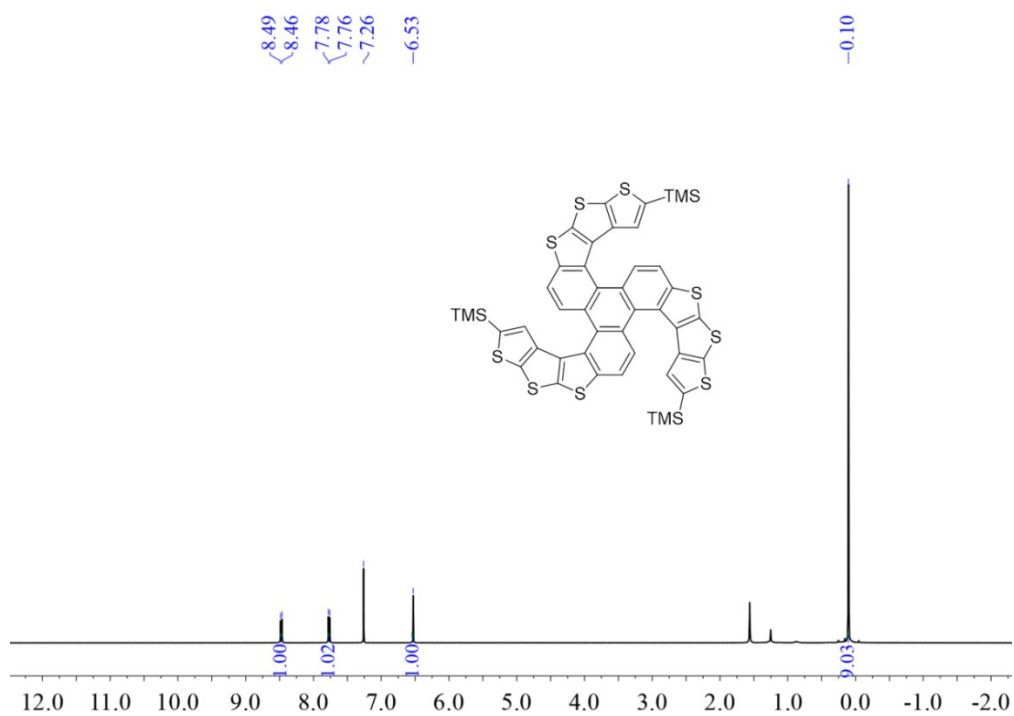

Fig. S22. <sup>1</sup>H NMR (400 MHz, CDCl<sub>3</sub>) spectrum of *rac-1a*

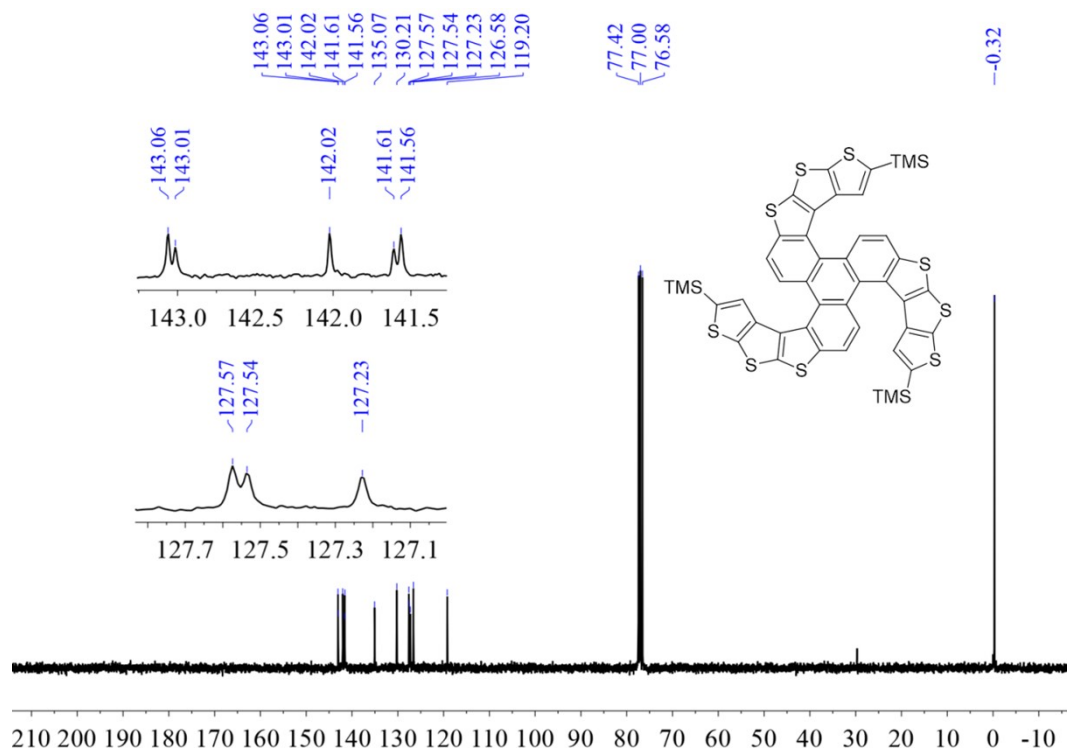

Fig. S23. <sup>13</sup>C NMR (100 MHz, CDCl<sub>3</sub>) spectra of *rac-1a*

Instrument: IonSpec 4.7 Tesla FTMS Card Serial Number: WI132017 Operator: HuaQin  
Date: 2013/10/16 Operation Mode: MALDI/DHB

### Elemental Composition Search Report:

#### Target Mass:

Target  $m/z$  =  $947.9608 \pm 0.004$   
Charge = +1

#### Possible Elements:

| Element | Exact Mass | Min | Max |
|---------|------------|-----|-----|
| C       | 12.000000  | 0   | 100 |
| H       | 1.007825   | 0   | 100 |
| Si      | 27.976927  | 0   | 4   |
| S       | 31.972071  | 0   | 10  |

#### Additional Search Restrictions:

DBE Limit Mode = Both Integer and Half-Integer  
Minimum DBE = 0

#### Search Results:

Number of Hits = 5

| $m/z$     | Delta $m/z$ | DBE  | Formula                       |
|-----------|-------------|------|-------------------------------|
| 947.96057 | 0.00023     | 28.0 | $C_{45}H_{36}Si_3S_9^{+1}$    |
| 947.96193 | -0.00113    | 55.0 | $C_{62}H_{16}Si_5^{+1}$       |
| 947.95856 | 0.00224     | 60.0 | $C_{65}H_{12}Si_4^{+1}$       |
| 947.96394 | -0.00314    | 23.0 | $C_{42}H_{40}Si_3S_{10}^{+1}$ |
| 947.95720 | 0.00360     | 33.0 | $C_{48}H_{32}Si_3S_8^{+1}$    |

Fig. S24. HRMS data of *rac-1a*

### NMR and HRMS spectra of *rac-1b*

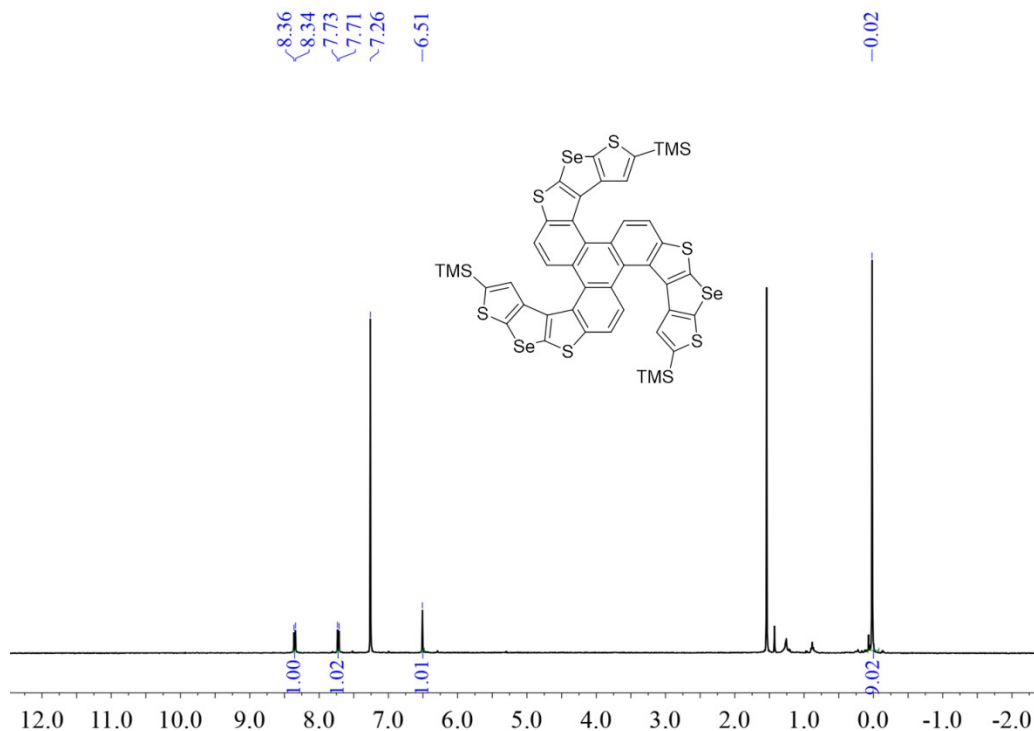

Fig. S25. <sup>1</sup>H NMR (400 MHz, CDCl<sub>3</sub>) spectrum of *rac-1b*

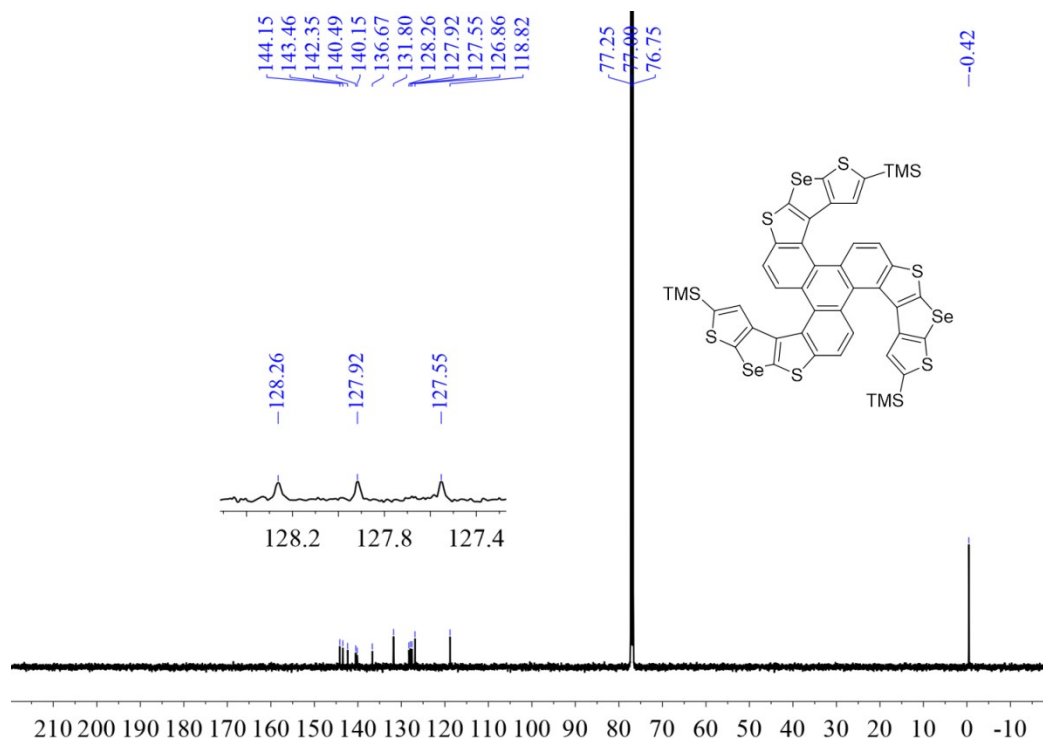

Fig. S26. <sup>13</sup>C NMR (125 MHz, CDCl<sub>3</sub>) spectra of *rac-1b*

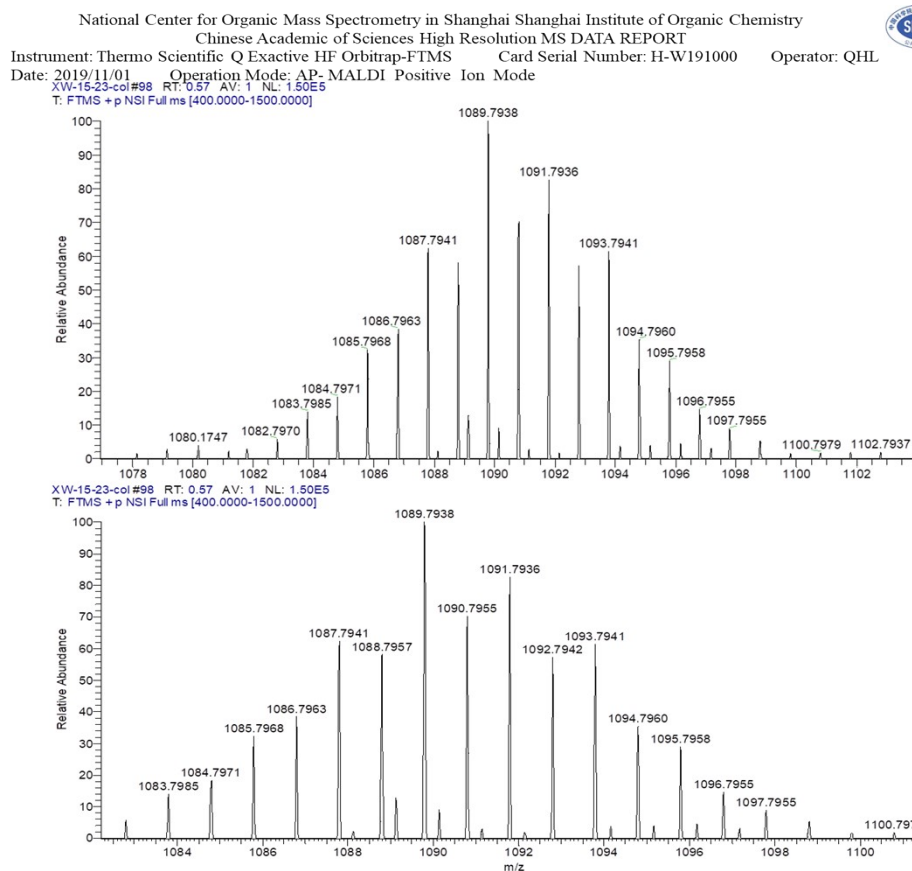

Fig. S27. HRMS spectra of *rac-1b*

**NMR and HRMS spectra of *rac-1c***

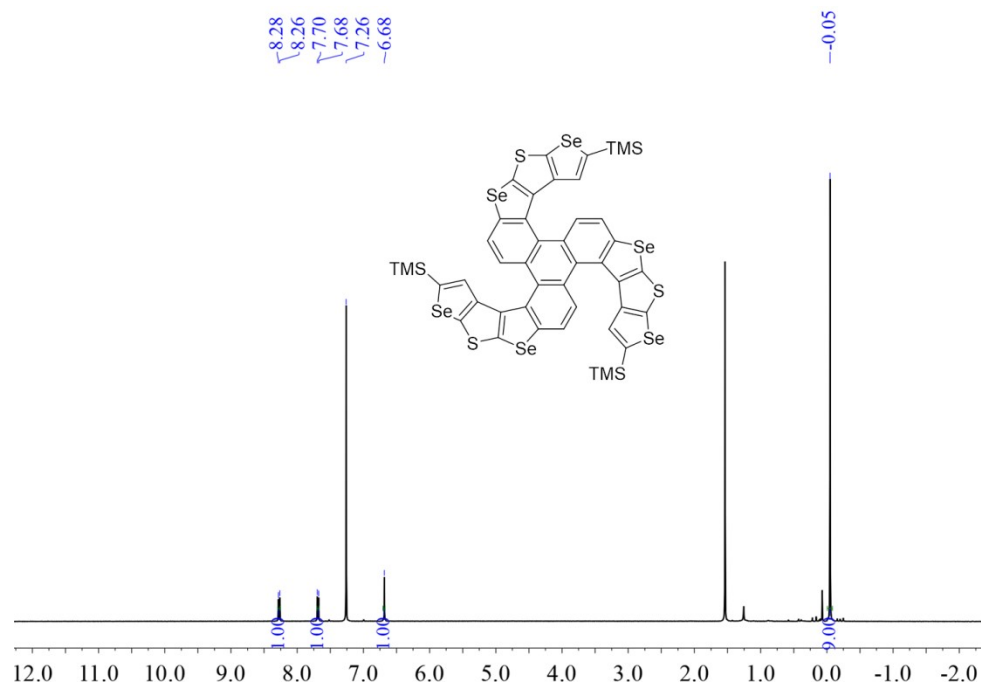

**Fig. S28.** <sup>1</sup>H NMR (400 MHz, CDCl<sub>3</sub>) spectrum of *rac-1c*

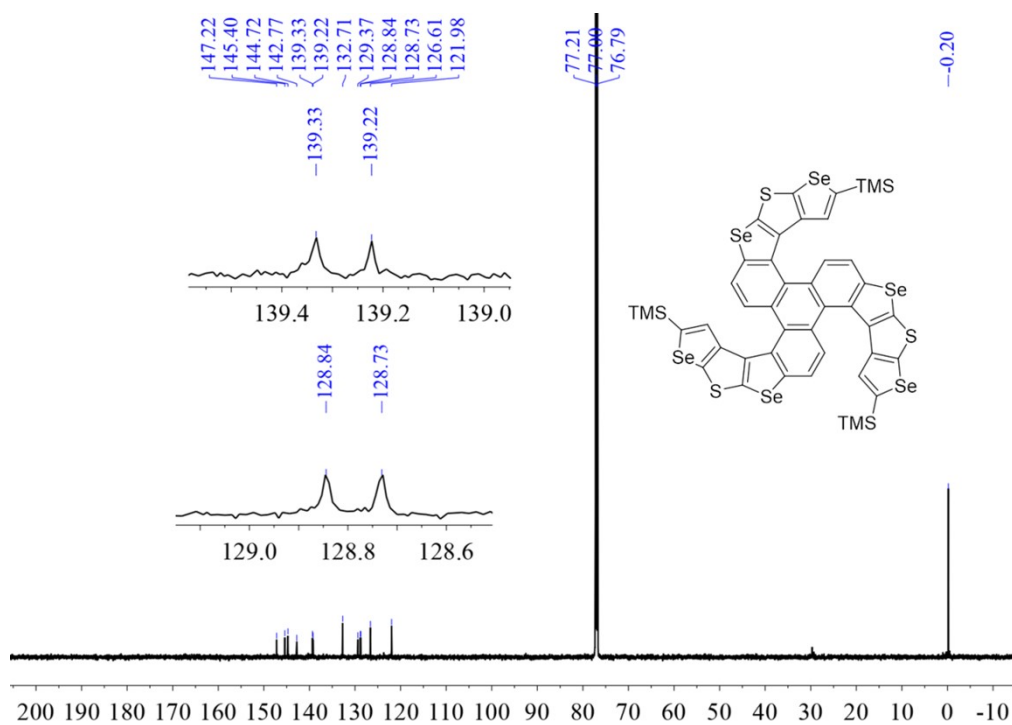

**Fig. S29.** <sup>13</sup>C NMR (150 MHz, CDCl<sub>3</sub>) spectra of *rac-1c*

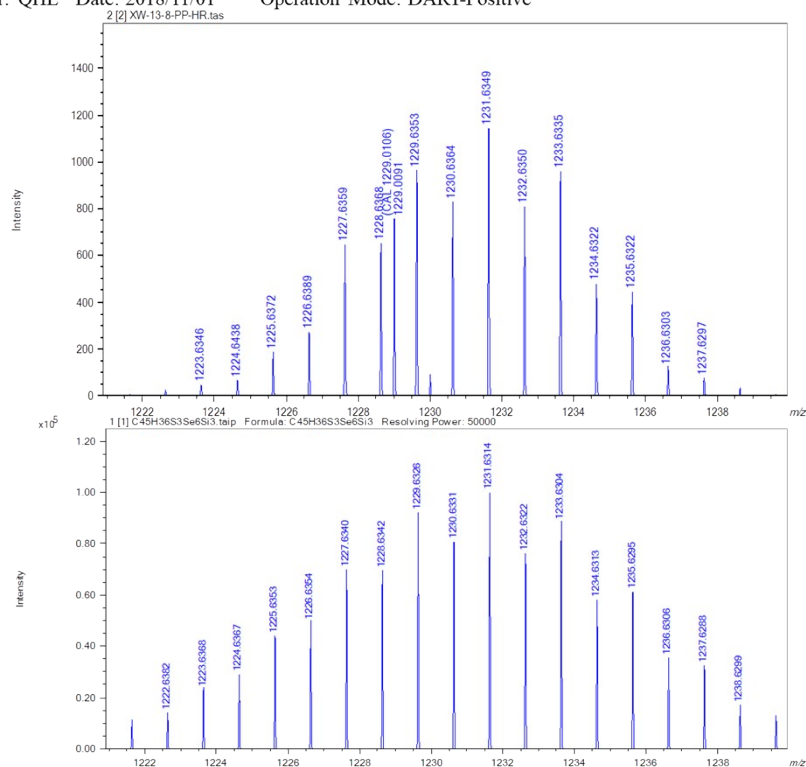

Fig. S30. HRMS spectra of *rac-1c*

### NMR and HRMS spectra of *rac-1d*

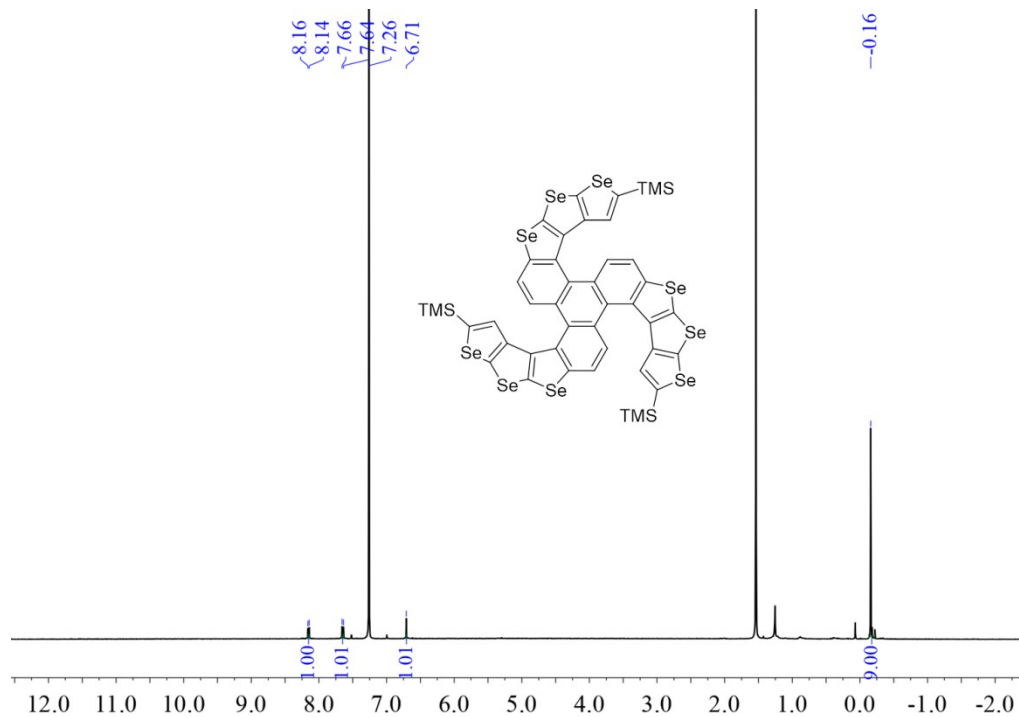

Fig. S31. <sup>1</sup>H NMR (400 MHz, CDCl<sub>3</sub>) spectrum of *rac-1d*

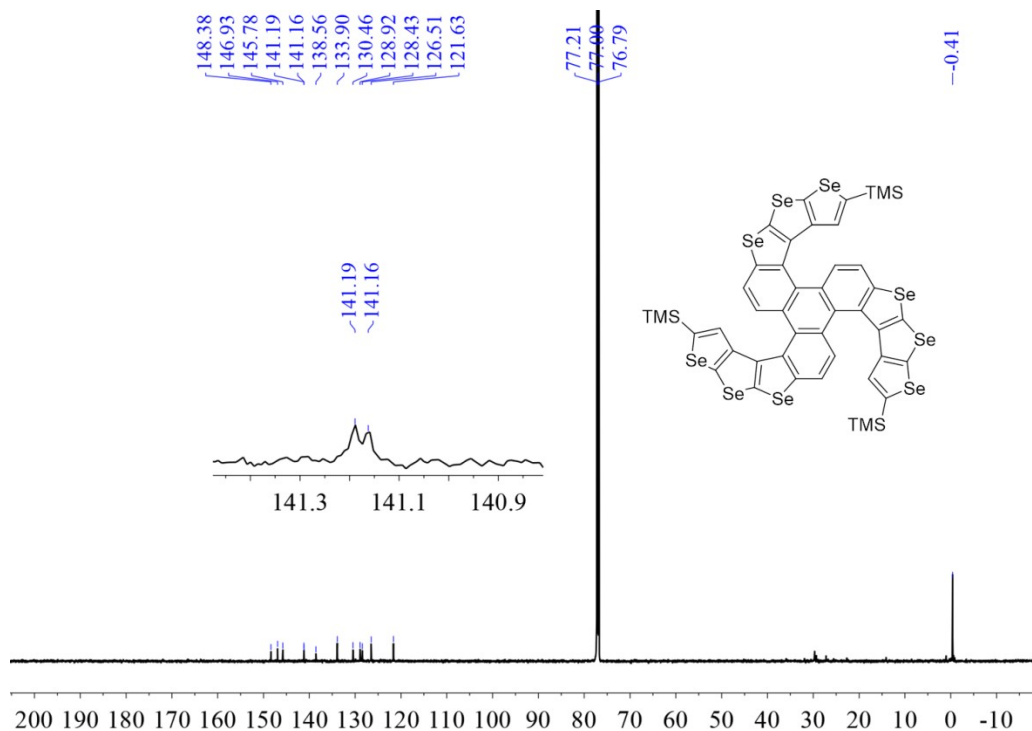

**Fig. S32.** <sup>13</sup>C NMR (150 MHz, CDCl<sub>3</sub>) spectra of *rac-1d*

National Center for Organic Mass Spectrometry in Shanghai Shanghai Institute of Organic Chemistry  
Chinese Academic of Sciences High Resolution MS DATA REPORT

Instrument: Thermo Scientific Q Exactive HF Orbitrap-FTMS  
Date: 2018/11/01

Card Serial Number: H-W181011

Operator : QHL

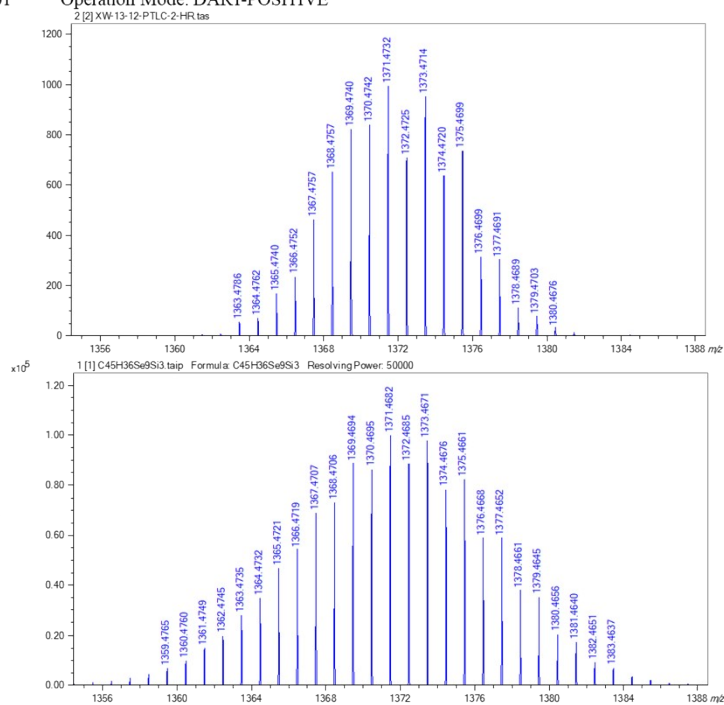

**Fig. S33.** HRMS spectra of *rac-1d*



### 3. Quantum Calculation of *rac-1(a)–(d)*

#### UV-vis spectra prediction and transition nature of *rac-1(a)–(d)*

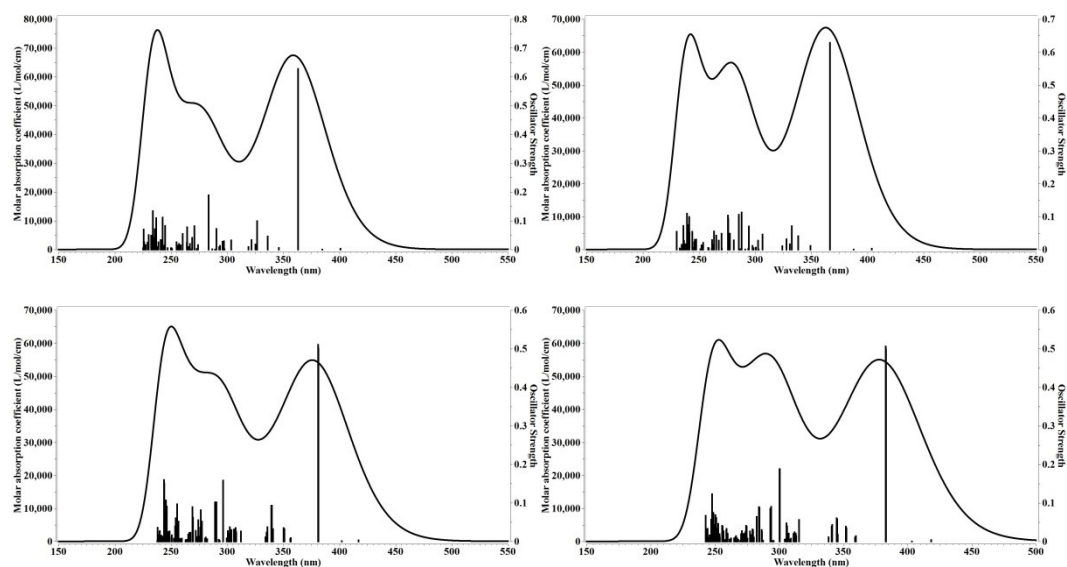

**Fig. S34.** The simulated UV-vis spectra of compounds *rac-1(a)–(d)* in dichloroethane solvent at the PCM-TD-B3LYP/6-31G\* level of theory.

**Table S1** Selected computational absorption energies (nm), oscillator strength (*f*), and transition nature in dichloromethane solvent for compounds *rac-1(a)–(d)* at the TD-B3LYP/6-31G\* level of theory.

|               |        | states                | $\lambda$    | <i>f</i> | Transition Contributions                                                                                                                |
|---------------|--------|-----------------------|--------------|----------|-----------------------------------------------------------------------------------------------------------------------------------------|
| <i>rac-1a</i> | Band-I | $S_0 \rightarrow S_3$ | 363.0 (3.42) | 0.6268   | HOMO-1 $\rightarrow$ LUMO (9%)<br>HOMO-1 $\rightarrow$ LUMO+1 (39%)<br>HOMO $\rightarrow$ LUMO (39%)<br>HOMO $\rightarrow$ LUMO+1(9%)   |
|               |        | $S_0 \rightarrow S_4$ | 363.0 (3.42) | 0.6270   | HOMO-1 $\rightarrow$ LUMO (39%)<br>HOMO-1 $\rightarrow$ LUMO+1 (9%)<br>HOMO $\rightarrow$ LUMO (9%)<br>HOMO $\rightarrow$ LUMO+1(39%)   |
| <i>rac-1b</i> | Band-I | $S_0 \rightarrow S_3$ | 366.7 (3.38) | 0.6282   | HOMO-1 $\rightarrow$ LUMO (31%)<br>HOMO-1 $\rightarrow$ LUMO+1 (17%)<br>HOMO $\rightarrow$ LUMO (16%)<br>HOMO $\rightarrow$ LUMO+1(31%) |
|               |        | $S_0 \rightarrow S_4$ | 366.7 (3.38) | 0.6278   | HOMO-1 $\rightarrow$ LUMO (16%)<br>HOMO-1 $\rightarrow$ LUMO+1 (31%)<br>HOMO $\rightarrow$ LUMO (31%)<br>HOMO $\rightarrow$ LUMO+1(17%) |

|               |        |                       |              |        |                                                                                                                                        |
|---------------|--------|-----------------------|--------------|--------|----------------------------------------------------------------------------------------------------------------------------------------|
| <i>rac-1c</i> | Band-I | $S_0 \rightarrow S_3$ | 381.2 (3.25) | 0.5000 | HOMO-1 $\rightarrow$ LUMO (9%)<br>HOMO-1 $\rightarrow$ LUMO+1 (40%)<br>HOMO $\rightarrow$ LUMO (36%)<br>HOMO $\rightarrow$ LUMO+1(11%) |
|               |        | $S_0 \rightarrow S_4$ | 380.9 (3.26) | 0.5101 | HOMO-1 $\rightarrow$ LUMO (37%)<br>HOMO-1 $\rightarrow$ LUMO+1 (11%)<br>HOMO $\rightarrow$ LUMO (9%)<br>HOMO $\rightarrow$ LUMO+1(39%) |
| <i>rac-1d</i> | Band-I | $S_0 \rightarrow S_3$ | 383.3 (3.24) | 0.4985 | HOMO-1 $\rightarrow$ LUMO (46%)<br>HOMO $\rightarrow$ LUMO+1(48%)                                                                      |
|               |        | $S_0 \rightarrow S_4$ | 383.0 (3.24) | 0.5061 | HOMO-1 $\rightarrow$ LUMO (49%)<br>HOMO $\rightarrow$ LUMO+1(45%)                                                                      |

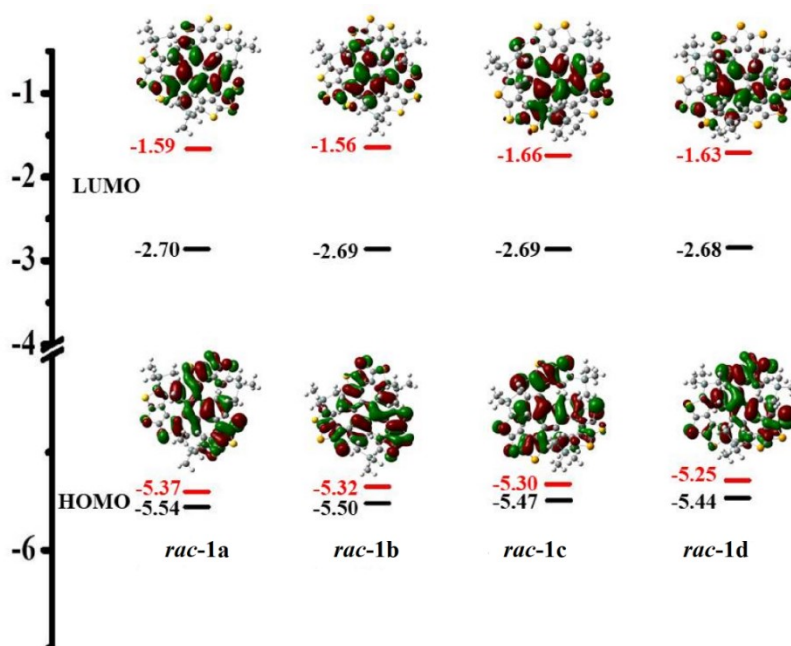

**Fig. S35.** Visualizations of HOMO and LUMO distributions (B3LYP/6-31G\*) for *rac-1(a)–(d)*.

**Table S2** Optical and electrochemical data of *rac-1(a)–(d)*.

| Compound     | $\lambda_{\text{onset}}$<br>(nm) | $\Phi_F$ | Time<br>(ns) | $E_{\text{ox}}$<br>(V) | $E_g^{\text{opt}}$<br>(eV) | HOMO<br>(eV)<br>experimental | HOMO<br>(eV)<br>theory | LUMO<br>(eV)<br>experimental | LUMO<br>(eV)<br>theory |
|--------------|----------------------------------|----------|--------------|------------------------|----------------------------|------------------------------|------------------------|------------------------------|------------------------|
| <i>rac-1</i> | 437                              | 0.029    | 3.35         | 1.18                   | 2.84                       | -5.54                        | -5.37                  | -2.70                        | -1.59                  |
| <i>rac-2</i> | 441                              | 0.020    | 3.10         | 1.16                   | 2.81                       | -5.50                        | -5.32                  | -2.69                        | -1.56                  |
| <i>rac-3</i> | 446                              | 0.011    | 2.47         | 1.14                   | 2.78                       | -5.47                        | -5.30                  | -2.69                        | -1.66                  |
| <i>rac-4</i> | 449                              | 0.008    | 2.11         | 1.10                   | 2.76                       | -5.44                        | -5.25                  | -2.68                        | -1.63                  |

Measured in anhydrous  $\text{CH}_2\text{Cl}_2/\text{Bu}_4\text{F}_6\text{NP}$  (0.1 M),  $[C] = 1 \times 10^{-3} \text{ mol L}^{-1}$ , vs  $\text{Fc}/\text{Fc}^+$ .

$$E_{\text{HOMO}} = -[E_{\text{ox}}^{\text{onset}} - E_{(\text{Fc}/\text{Fc}^+)} + 4.8] \text{ eV}. \quad E_{\text{LUMO}} = E_g^{\text{(opt)}} + E_{\text{HOMO}}.$$

#### 4. Resolution of *rac*-**1c**

The resolution of the *rac*-**1c** was carried out by chiral HPLC with methanol/dichloromethane/diethylamine (80/20/0.1, v/v/v) as eluent. The two enantiomers were obtained on a semipreparative scaled chiral column (ID). From the 15 mg scale of *rac*-**1c**, 0.6 mg (*ee* > 97%) of (+)-**1c** and 1.6 mg (*ee* > 99%) of (-)-**1c** were efficiently obtained.

#### HPLC trace of (+)-**1c**, (-)-**1c**, and *rac*-**1c**

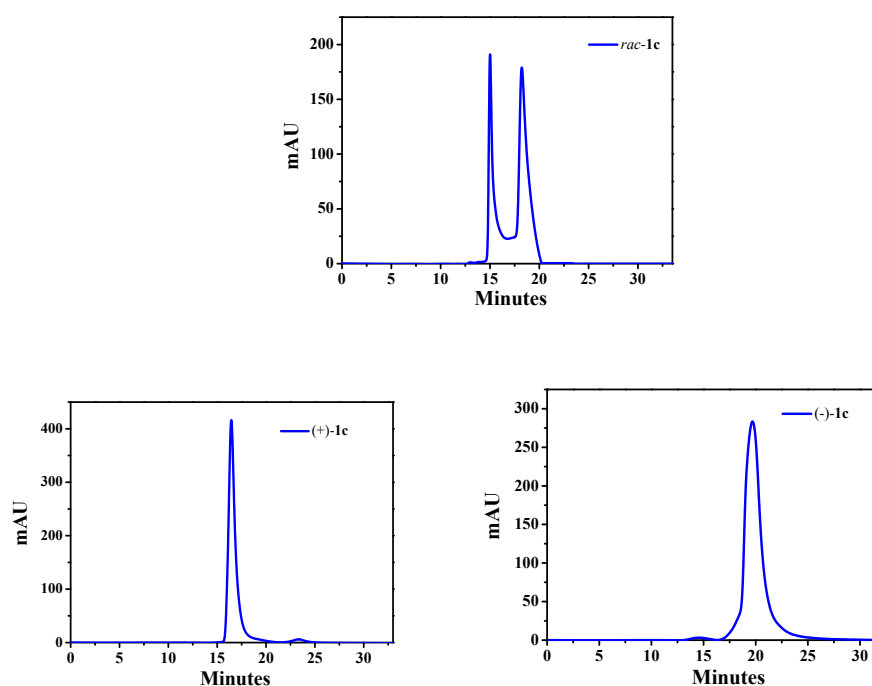

**Fig. S36.** HPLC trace of *rac*-**1c** (top), (+)-**1c** (bottom left, *ee* > 97%) and (-)-**1c** (bottom right, *ee* > 99%) at room temperature. Conditions: Eluent: methanol/dichloromethane/diethylamine (80/20/0.1, v/v/v), Flow Rate: 1.0 mL/min, Column: CHIRALPAK-ID.

#### Racemization of (-)-**1c**

Racemization of (-)-**1c** was carried out in CH<sub>2</sub>Cl<sub>2</sub> by heating at different temperatures. The process was monitored from time to time by chiral HPLC (CHIRALPAK-ID) with methanol/dichloromethane/diethylamine (80/20/0.1, v/v/v) as eluent. The half-life of racemization of (-)-**1c** is proposed as below:

$$\begin{array}{ccc}
 (+) \text{-1c} & \rightarrow & (-) \text{-1c} \\
 t = 0 & C_0 & 0 \\
 t = t & C_t & C_0 - C_t
 \end{array}$$

The racemization of (-)-1c could be taken as first-order reaction, so

$$\ln C_0 / C_t = kt$$

Here,  $C_0$  is the concentration of (-)-1c before heating, and  $C_t$  is the concentration of (-)-1c after heating for time of  $t$ .

Because

$$\begin{aligned}
 ee &= \frac{C_t - (C_0 - C_t)}{C_t + (C_0 + C_t)} = \frac{2C_t - C_0}{C_0} = 2 \frac{C_t}{C_0} - 1 \\
 &\Rightarrow \frac{C_t}{C_0} = \frac{ee + 1}{2}
 \end{aligned}$$

So, we can obtain the formula as below:

$$\begin{aligned}
 \ln \frac{C_0}{C_t} &= \ln \frac{2}{ee + 1} = kt \\
 \Rightarrow \ln \frac{ee + 1}{2} &= -kt
 \end{aligned}$$

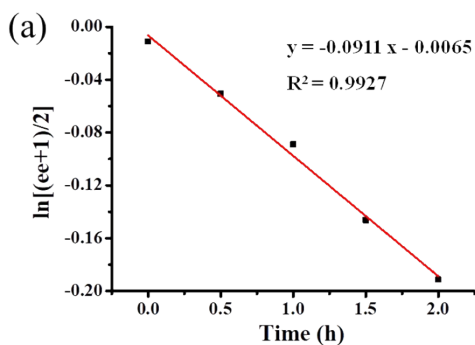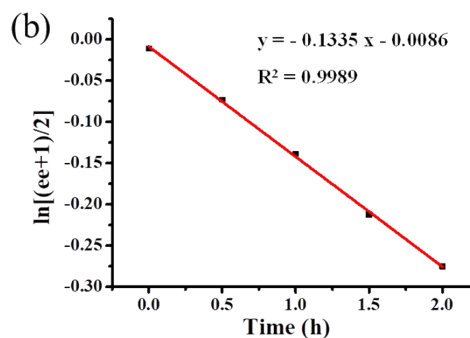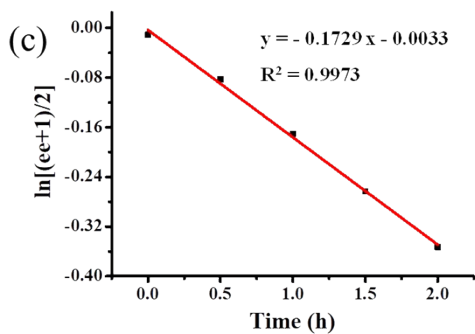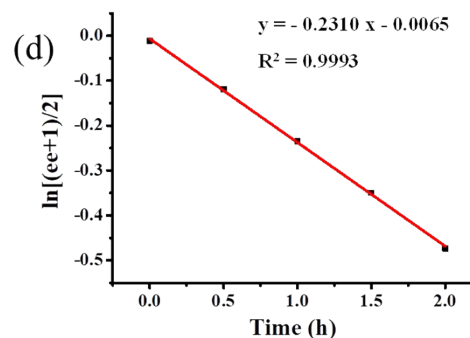

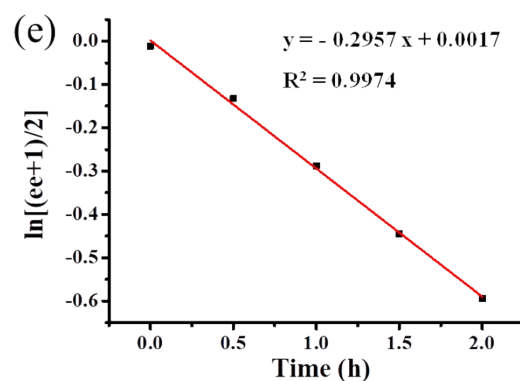

**Fig. S37.** Time-dependent enantiomeric excess value decay profiles at (a) 70 °C, (b) 75 °C, (c) 80 °C, (d) 85 °C and (e) 90 °C, respectively.

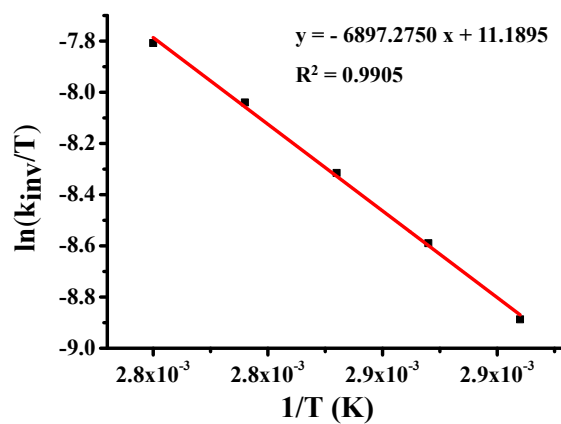

**Fig. S38.** The half-life of (-)-1c at different temperatures.

**Table S3.** The half-life of (-)-1c at different temperatures.

| T/°C        | 70   | 75   | 80   | 85   | 90   |
|-------------|------|------|------|------|------|
| $t_{1/2}/h$ | 7.61 | 5.19 | 4.00 | 3.00 | 2.34 |

## 5. X-ray Crystallographic Data

### X-ray crystallographic data of *rac-1a*

**Table S4.** Crystal data and structure refinement for *rac-1a*

|                                   |                                                                                                                                |
|-----------------------------------|--------------------------------------------------------------------------------------------------------------------------------|
| Identification code               | <i>rac-1a</i>                                                                                                                  |
| Empirical formula                 | C <sub>45</sub> H <sub>36</sub> OS <sub>9</sub> Si <sub>3</sub>                                                                |
| Formula weight                    | 965.55                                                                                                                         |
| Temperature                       | 296(2) K                                                                                                                       |
| Wavelength                        | 0.71073 Å                                                                                                                      |
| Crystal system, space group       | Monoclinic, <i>P2<sub>1</sub>/c</i>                                                                                            |
| Unit cell dimensions              | $a = 25.663(6)$ Å $\alpha = 90^\circ$<br>$b = 18.397(5)$ Å $\beta = 104.320(5)^\circ$<br>$c = 23.432(6)$ Å $\gamma = 90^\circ$ |
| Volume                            | 10719(5) Å <sup>3</sup>                                                                                                        |
| Z                                 | 8                                                                                                                              |
| Density (Calculated)              | 1.197 Mg/m <sup>3</sup>                                                                                                        |
| Absorption coefficient            | 0.469 mm <sup>-1</sup>                                                                                                         |
| F(000)                            | 4000                                                                                                                           |
| Crystal size                      | 0.48 × 0.23 × 0.22 mm <sup>3</sup>                                                                                             |
| Theta range for data collection   | 1.98 to 25.00°                                                                                                                 |
| Limiting indices                  | -26 ≤ h ≤ 30, -21 ≤ k ≤ 21, -24 ≤ l ≤ 27                                                                                       |
| Reflections collected / unique    | 54813 / 18767 [R <sub>int</sub> = 0.0435]                                                                                      |
| Completeness to theta = 25.00     | 99.4 %                                                                                                                         |
| Absorption correction             | Semi-empirical from equivalents                                                                                                |
| Max. and min. transmission        | 0.9038 and 0.8060                                                                                                              |
| Refinement method                 | Full-matrix least-squares on F <sup>2</sup>                                                                                    |
| Data / restraints / parameters    | 18767 / 84 / 1063                                                                                                              |
| Goodness-of-fit on F <sup>2</sup> | 1.129                                                                                                                          |
| Final R indices [I > 2σ(I)]       | R <sub>1</sub> = 0.0791, wR <sub>2</sub> = 0.1948                                                                              |
| R indices (all data)              | R <sub>1</sub> = 0.1233, wR <sub>2</sub> = 0.2077                                                                              |
| Largest diff. peak and hole       | 1.291 and -0.564 e. Å <sup>-3</sup>                                                                                            |

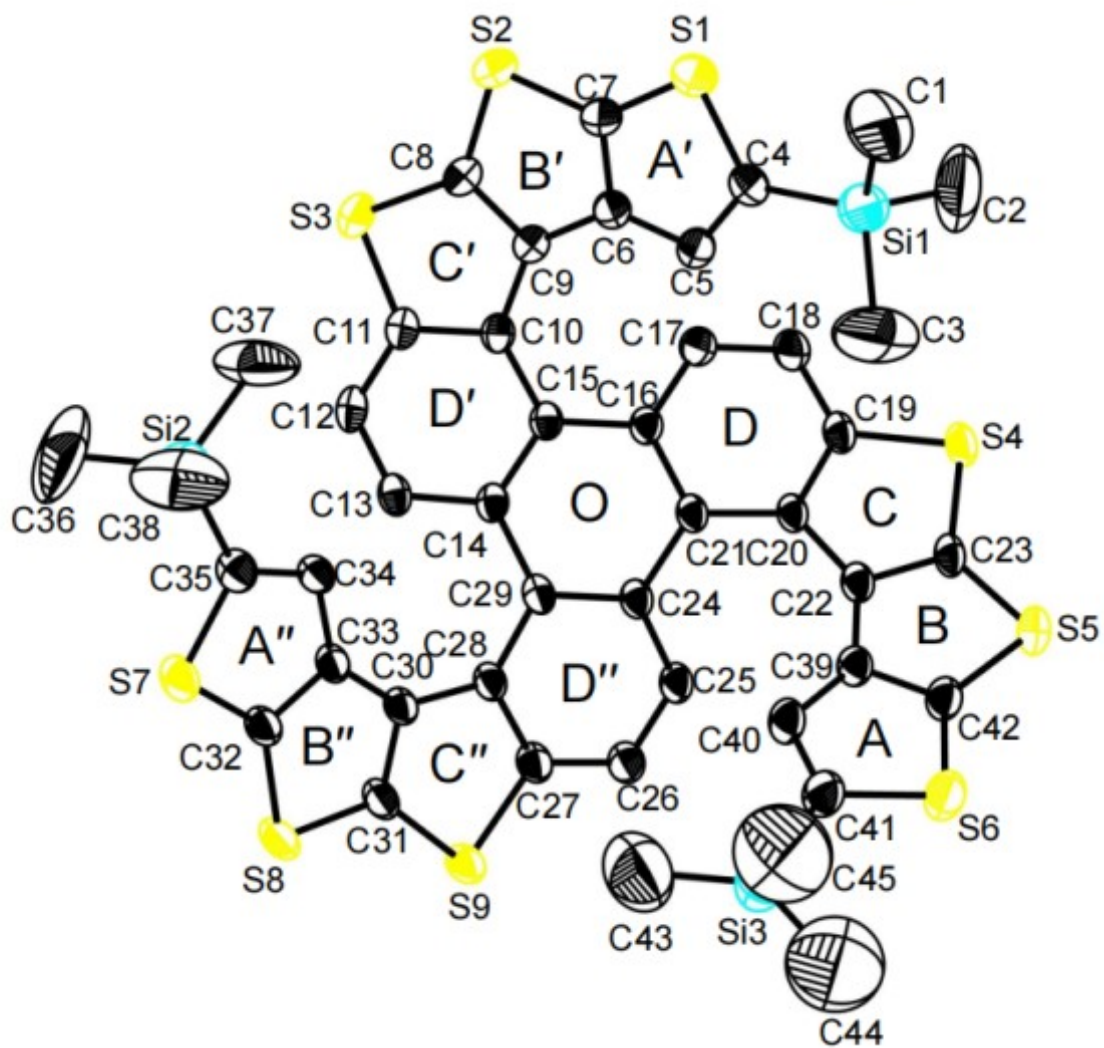

**Fig. S39.** Molecular structure for *rac*-1a, Carbon, selenium, sulfur, and silicon atoms are depicted with thermal ellipsoids set at 30% probability level, and all hydrogen atoms are omitted for clarity.

## X-ray crystallographic data of *rac-1b*

**Table S5.** Crystal data and structure refinement for *rac-1b*

|                                      |                                                                                                                                                        |
|--------------------------------------|--------------------------------------------------------------------------------------------------------------------------------------------------------|
| Identification code                  | <i>rac-1b</i>                                                                                                                                          |
| Empirical formula                    | C <sub>45</sub> H <sub>36</sub> S <sub>6</sub> Se <sub>3</sub> Si <sub>3</sub>                                                                         |
| Formula weight                       | 1090.25                                                                                                                                                |
| Temperature                          | 298.01 K                                                                                                                                               |
| Crystal system, space group          | Monoclinic, <i>P</i> 2 <sub>1</sub> / <i>c</i>                                                                                                         |
| Unit cell dimensions                 | $a = 25.663(3) \text{ \AA}$ $\alpha = 90^\circ$<br>$b = 18.4115(18) \text{ \AA}$ $\beta = 90^\circ$<br>$c = 23.619(2) \text{ \AA}$ $\gamma = 90^\circ$ |
| Volume                               | 10803.4(18) $\text{\AA}^3$                                                                                                                             |
| Z                                    | 8                                                                                                                                                      |
| Density (Calculated)                 | 1.341 Mg/m <sup>3</sup>                                                                                                                                |
| Absorption coefficient               | 5.502 mm <sup>-1</sup>                                                                                                                                 |
| F(000)                               | 4368                                                                                                                                                   |
| Crystal size                         | 0.17 × 0.09 × 0.04 mm <sup>3</sup>                                                                                                                     |
| Radiation                            | CuK $\alpha$ ( $\lambda = 1.54178$ )                                                                                                                   |
| Theta range for data collection      | 5.974 to 134.144°                                                                                                                                      |
| Index ranges                         | -30 ≤ h ≤ 30, -21 ≤ k ≤ 21, -28 ≤ l ≤ 23                                                                                                               |
| Reflections collected                | 88921                                                                                                                                                  |
| Independent reflections              | 19069 [ $R_{\text{int}} = 0.1462$ , $R_{\text{sigma}} = 0.0953$ ]                                                                                      |
| Data / restraints / parameters       | 19069 / 353 / 1108                                                                                                                                     |
| Goodness-of-fit on F <sup>2</sup>    | 1.097                                                                                                                                                  |
| Final R indices [ $I > 2\sigma(I)$ ] | $R_1 = 0.0714$ , $wR_2 = 0.1780$                                                                                                                       |
| R indices (all data)                 | $R_1 = 0.1219$ , $wR_2 = 0.2100$                                                                                                                       |
| Largest diff. peak and hole          | 0.58 and -0.72e. $\text{\AA}^{-3}$                                                                                                                     |



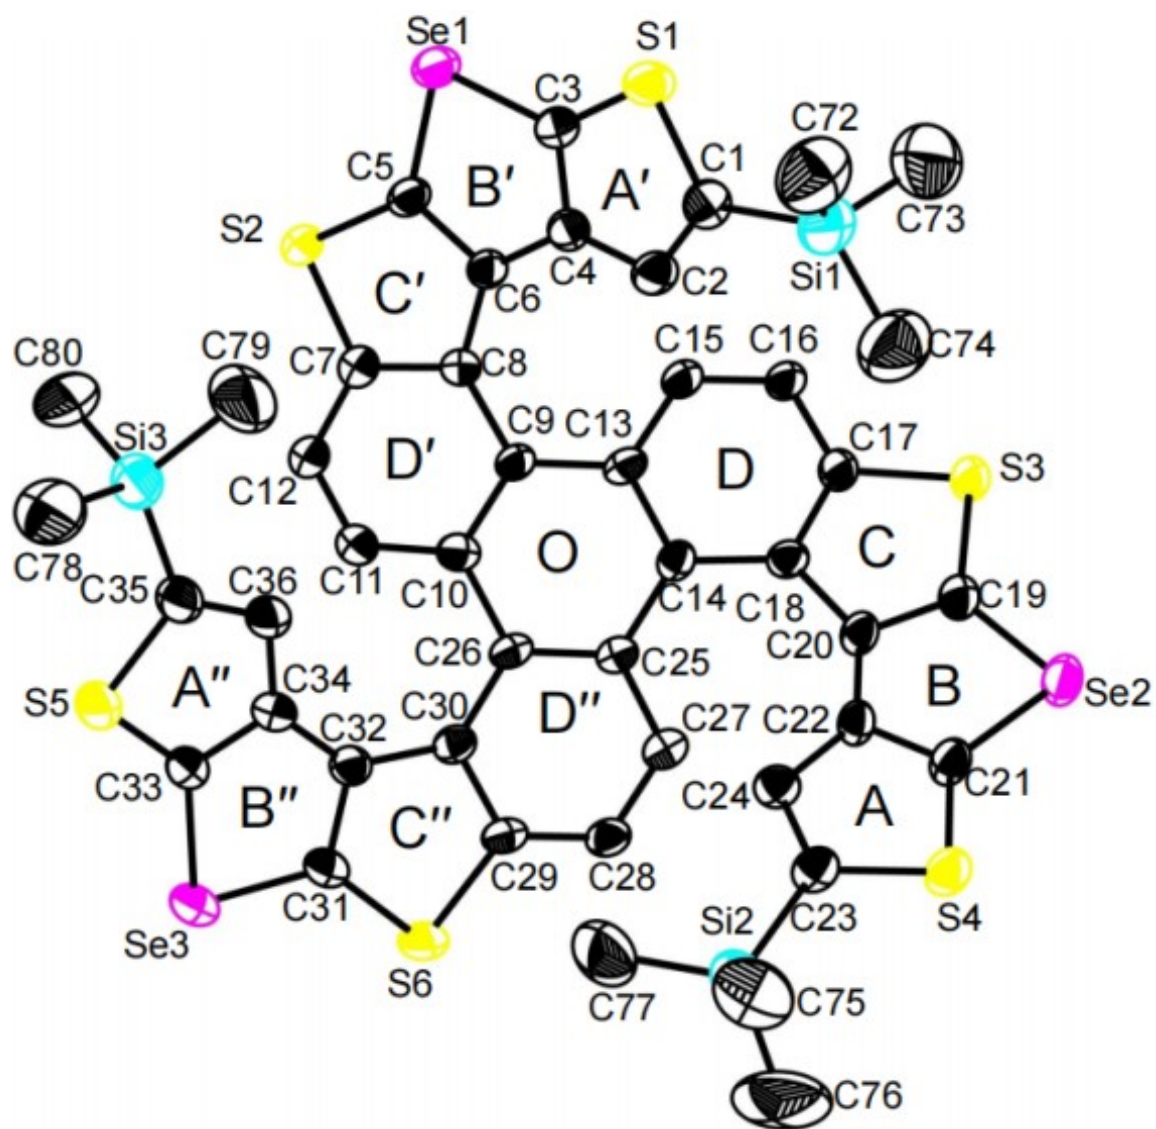

**Fig. S40.** Molecular structure for *rac-1b*, Carbon, selenium, sulfur, and silicon atoms are depicted with thermal ellipsoids set at 30% probability level, and all hydrogen atoms are omitted for clarity.

## X-ray crystallographic data of *rac-1c*

**Table S6.** Crystal data and structure refinement for *rac-1c*

|                                   |                                                                                                 |
|-----------------------------------|-------------------------------------------------------------------------------------------------|
| Identification code               | <i>rac-1c</i>                                                                                   |
| Empirical formula                 | C <sub>45</sub> H <sub>36</sub> S <sub>3</sub> Se <sub>6</sub> Si <sub>3</sub>                  |
| Formula weight                    | 1230.96                                                                                         |
| Temperature                       | 293(2) K                                                                                        |
| Crystal system, space group       | cubic, <i>Pa</i> -3                                                                             |
| Unit cell dimensions              | a = 21.30032(10) Å    α = 90°<br>b = 21.30032(10) Å    β = 90°<br>c = 21.30032(10) Å    γ = 90° |
| Volume                            | 9664.03(13) Å <sup>3</sup>                                                                      |
| Z                                 | 7.99992                                                                                         |
| Density (Calculated)              | 1.692 Mg/m <sup>3</sup>                                                                         |
| Absorption coefficient            | 7.524 mm <sup>-1</sup>                                                                          |
| F(000)                            | 4800.0                                                                                          |
| Crystal size                      | 0.1611 × 0.1222 × 0.0669 mm <sup>3</sup>                                                        |
| Radiation                         | CuKα (λ = 1.54184)                                                                              |
| Theta range for data collection   | 7.188 to 133.822°                                                                               |
| Index ranges                      | -19 ≤ h ≤ 25, -25 ≤ k ≤ 24, -19 ≤ l ≤ 25                                                        |
| Reflections collected             | 23768                                                                                           |
| Independent reflections           | 2879 [R <sub>int</sub> = 0.0392, R <sub>sigma</sub> = 0.0202]                                   |
| Data / restraints / parameters    | 2879 / 0 / 175                                                                                  |
| Goodness-of-fit on F <sup>2</sup> | 1.049                                                                                           |
| Final R indices [I > 2σ(I)]       | R <sub>1</sub> = 0.0370, wR <sub>2</sub> = 0.0985                                               |
| R indices (all data)              | R <sub>1</sub> = 0.0454, wR <sub>2</sub> = 0.1034                                               |
| Largest diff. peak and hole       | 0.63 and -0.26e. Å <sup>-3</sup>                                                                |

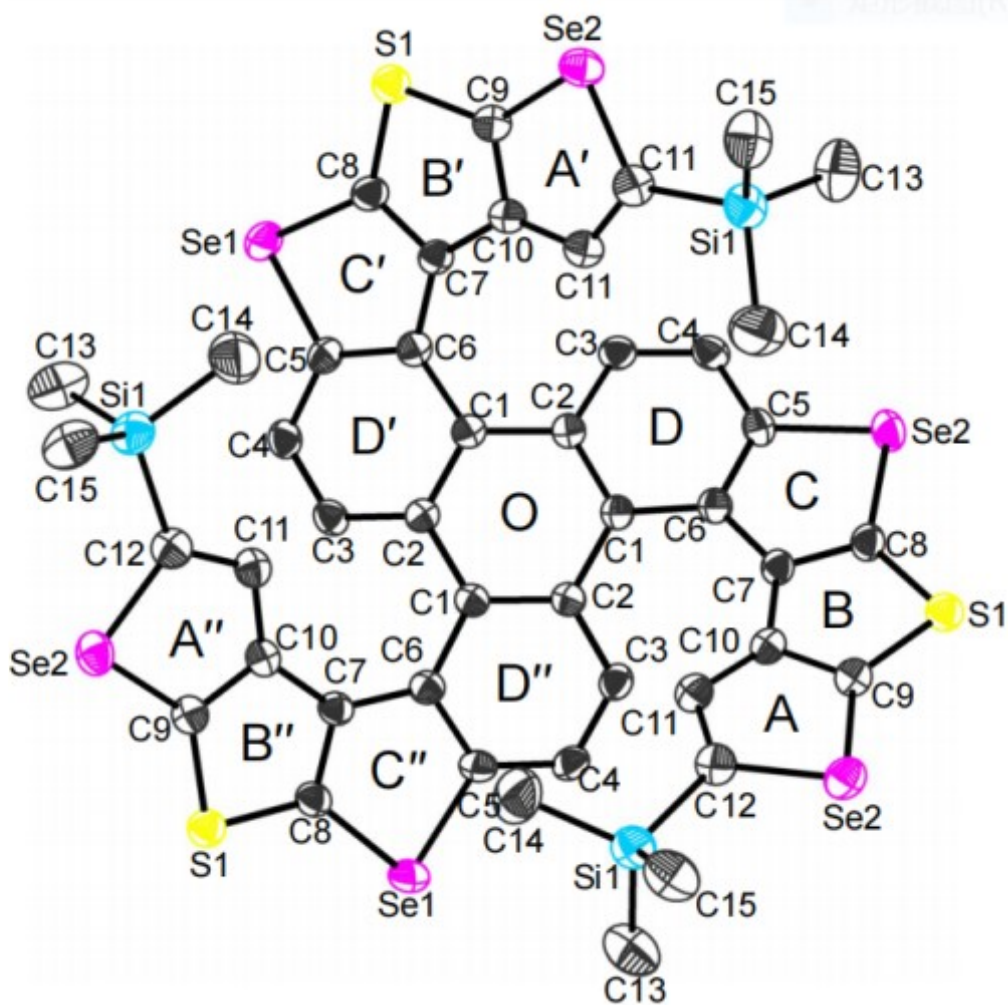

**Fig. S41.** Molecular structure for *rac*-1c, Carbon, selenium, sulfur, and silicon atoms are depicted with thermal ellipsoids set at 30% probability level, and all hydrogen atoms are omitted for clarity.

## X-ray crystallographic data of *rac-1d*

**Table S7.** Crystal data and structure refinement for *rac-1d*

|                                      |                                                                                                                                                                     |
|--------------------------------------|---------------------------------------------------------------------------------------------------------------------------------------------------------------------|
| Identification code                  | <i>rac-1d</i>                                                                                                                                                       |
| Empirical formula                    | C <sub>91</sub> H <sub>74</sub> Cl <sub>2</sub> Se <sub>18</sub> Si <sub>6</sub>                                                                                    |
| Formula weight                       | 2828.22                                                                                                                                                             |
| Temperature                          | 293(2) K                                                                                                                                                            |
| Crystal system, space group          | Monoclinic, <i>P</i> 2 <sub>1</sub> / <i>n</i>                                                                                                                      |
| Unit cell dimensions                 | $a = 15.2593(17) \text{ \AA}$ $\alpha = 90^\circ$<br>$b = 19.9001(3) \text{ \AA}$ $\beta = 95.0760(10)^\circ$<br>$c = 16.53532(18) \text{ \AA}$ $\gamma = 90^\circ$ |
| Volume                               | 5001.44(10) $\text{\AA}^3$                                                                                                                                          |
| Z                                    | 2                                                                                                                                                                   |
| Density (Calculated)                 | 1.878 Mg/m <sup>3</sup>                                                                                                                                             |
| Absorption coefficient               | 9.099 mm <sup>-1</sup>                                                                                                                                              |
| F(000)                               | 2700.0                                                                                                                                                              |
| Crystal size                         | 0.1525 × 0.0577 × 0.0404 mm <sup>3</sup>                                                                                                                            |
| Radiation                            | CuK $\alpha$ ( $\lambda = 1.54184$ )                                                                                                                                |
| Theta range for data collection      | 6.966 to 134.16°                                                                                                                                                    |
| Index ranges                         | -18 ≤ h ≤ 18, -21 ≤ k ≤ 23, -12 ≤ l ≤ 19                                                                                                                            |
| Reflections collected                | 21782                                                                                                                                                               |
| Independent reflections              | 8906 [ $R_{\text{int}} = 0.0297$ , $R_{\text{sigma}} = 0.0386$ ]                                                                                                    |
| Data / restraints / parameters       | 8906 / 106 / 586                                                                                                                                                    |
| Goodness-of-fit on F <sup>2</sup>    | 1.041                                                                                                                                                               |
| Final R indices [ $I > 2\sigma(I)$ ] | $R_1 = 0.0455$ , $wR_2 = 0.1246$                                                                                                                                    |
| R indices (all data)                 | $R_1 = 0.0596$ , $wR_2 = 0.1354$                                                                                                                                    |
| Largest diff. peak and hole          | 0.83 and -0.52e. $\text{\AA}^{-3}$                                                                                                                                  |

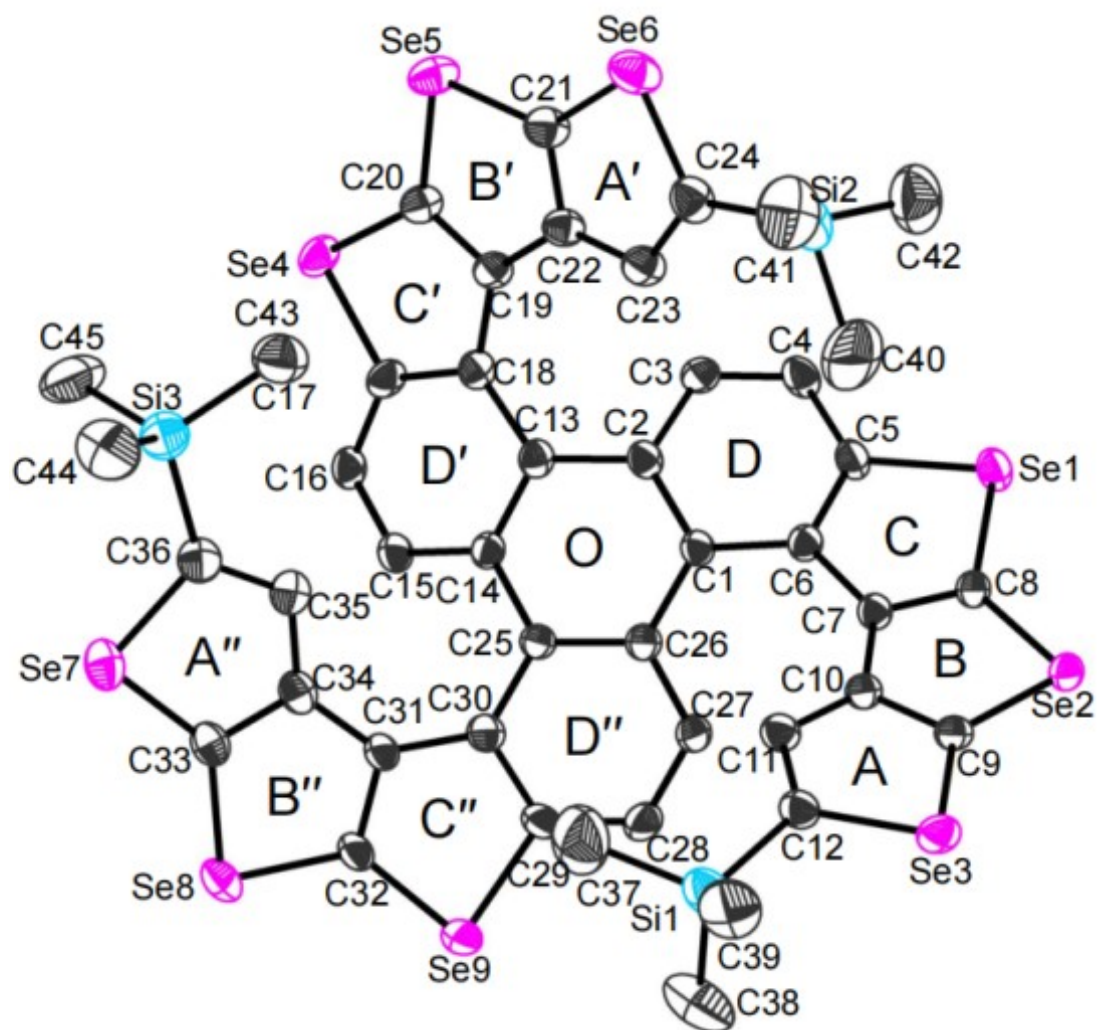

**Fig. S42.** Molecular structure for *rac*-**1d**, Carbon, selenium, sulfur, and silicon atoms are depicted with thermal ellipsoids set at 30% probability level, and all hydrogen atoms are omitted for clarity.

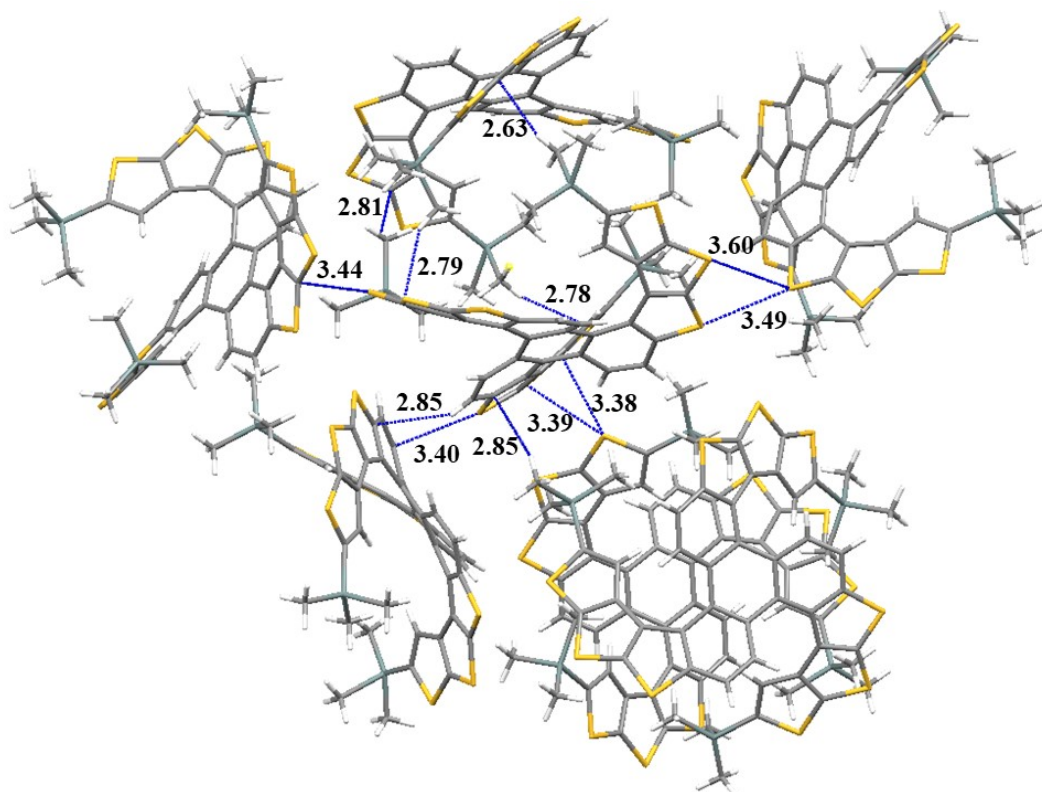

**Fig. S43.** Multiple interactions in the crystal packings of *rac-1a*.

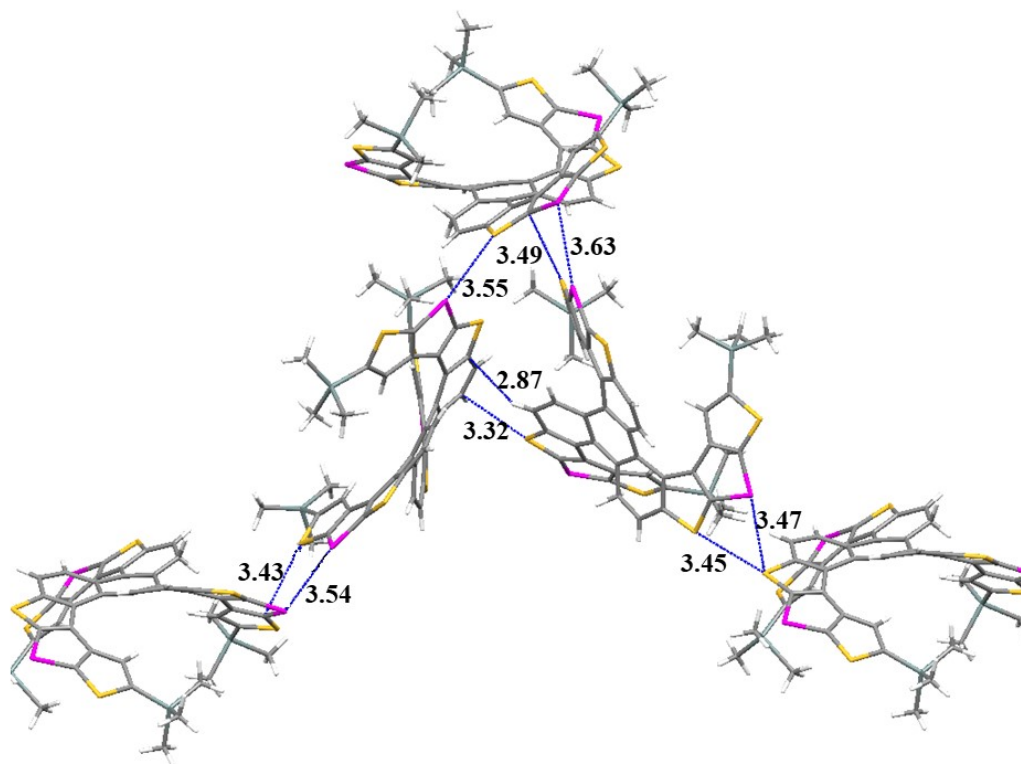

**Fig. S44.** Multiple interactions in the crystal packings of *rac-1b*.

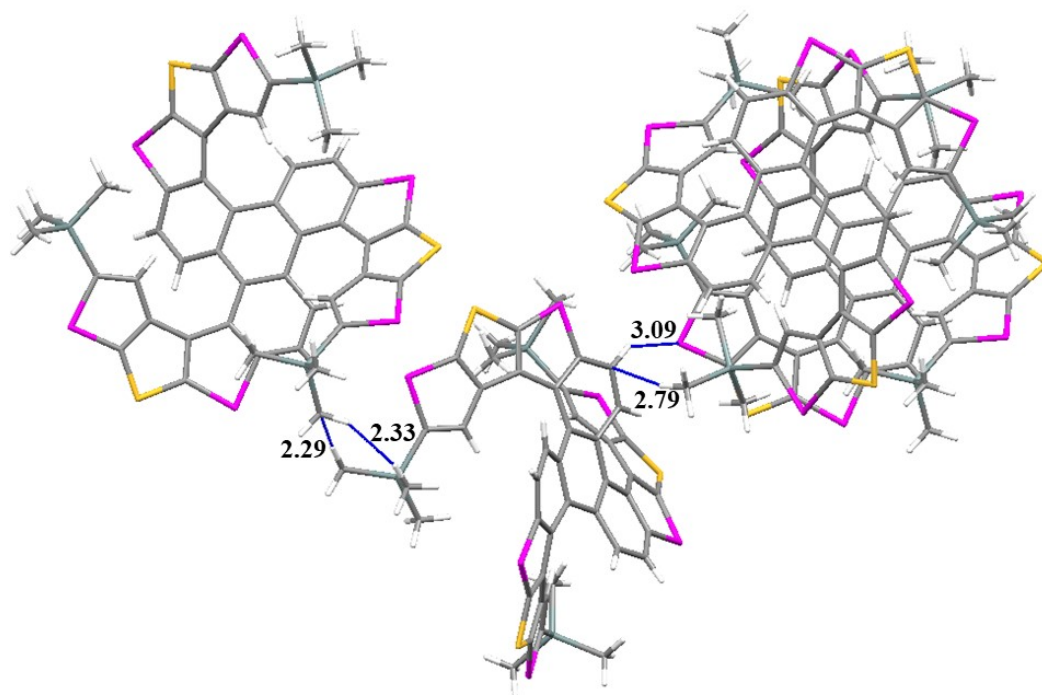

Fig. S45. Multiple interactions in the crystal packings of *rac-1c*.

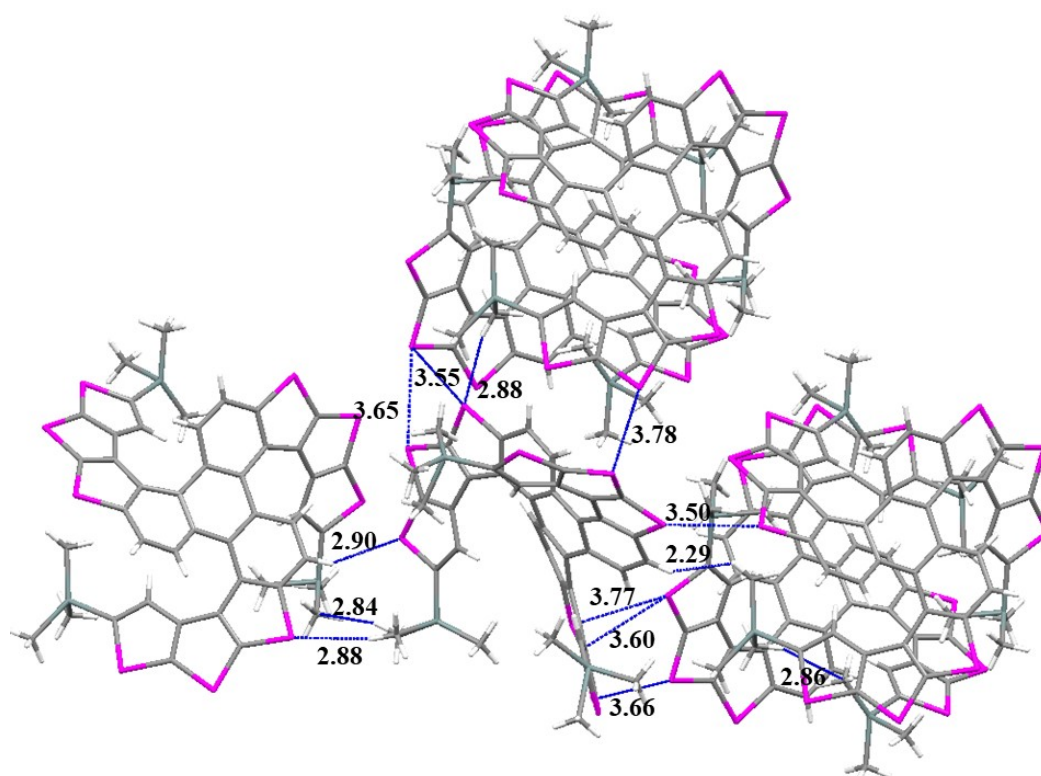

Fig. S46. Multiple interactions in the crystal packings of *rac-1d*.

**Table S8.** Intermolecular interactions (Å) of *rac-1(a)–(d)*

| Compound      | Intermolecular interactions (Å)                                                                                                                                                                                                                                       |
|---------------|-----------------------------------------------------------------------------------------------------------------------------------------------------------------------------------------------------------------------------------------------------------------------|
| <i>rac-1a</i> | S6···S17: 3.39, S10···S13: 3.49, S11···S13: 3.60, C13···S16: 3.40, C54···S15: 3.44, C83···S6: 3.38, S18···H46A: 2.78, C11···H78A: 2.85, C52···H71B: 2.81, C66···H89C: 2.79, C79···H36A: 2.85, C83···H46A: 2.63                                                        |
| <i>rac-1b</i> | S2···S3: 3.43, S8···S12: 3.45, C27···S10: 3.32, C67···S7: 3.49, Se6···S8: 3.47, Se4···Se6: 3.63, H13A···H15A: 2.29, H87C···S9: 2.83, H87C···C58: 2.66                                                                                                                 |
| <i>rac-1c</i> | Se2···H4: 3.09, C4···H13B: 2.79, H13C···H13C: 2.33, H13A···H15A: 2.29                                                                                                                                                                                                 |
| <i>rac-1d</i> | Se1···Se5: 3.55, Se2···Se4: 3.78, Se2···Se5: 3.65, Se5···Se8: 3.66, Se6···Se9: 3.77, Se9···Se4: 3.50, Se6···C32: 3.60, Se1···H39B: 2.88, Se3···H4: 2.90, C38···H42C: 2.50, C42···H38A: 2.84, C43···H39A: 2.86, H37B···H16: 2.29, H43C···H39A: 2.35, H42C···H38B: 2.36 |

**Table S9.** Dihedral angles of fused aromatic rings in *rac-1(a)–(d)*

|               | Ring plane | Dihedral angles/° | Ring plane | Dihedral angles/° | Ring plane | Dihedral angles/° |
|---------------|------------|-------------------|------------|-------------------|------------|-------------------|
| <i>rac-1a</i> | AB         | 6.36              | A'B'       | 2.49              | A''B''     | 5.67              |
|               | BC         | 8.60              | B'C'       | 7.77              | B''C''     | 9.17              |
|               | CD         | 9.73              | C'D'       | 10.63             | C''D''     | 9.25              |
|               | DO         | 14.41             | D'O'       | 16.15             | D''O''     | 16.13             |
|               | AD''       | 46.69             | A'D        | 43.43             | A''D'      | 50.80             |
| <i>rac-1b</i> | AB         | 4.48              | A'B'       | 5.68              | A''B''     | 6.16              |
|               | BC         | 6.75              | B'C'       | 8.17              | B''C''     | 8.65              |
|               | CD         | 9.84              | C'D'       | 9.34              | C''D''     | 8.70              |
|               | DO         | 17.13             | D'O'       | 18.35             | D''O''     | 15.62             |
|               | AD''       | 44.39             | A'D        | 49.64             | A''D'      | 45.64             |
| <i>rac-1c</i> | AB         | 5.69              | A'B'       | 5.69              | A''B''     | 5.69              |
|               | BC         | 7.89              | B'C'       | 7.89              | B''C''     | 7.89              |
|               | CD         | 9.23              | C'D'       | 9.23              | C''D''     | 9.23              |
|               | DO         | 15.98             | D'O'       | 15.98             | D''O''     | 15.98             |
|               | AD''       | 44.63             | A'D        | 44.63             | A''D'      | 44.63             |
| <i>rac-1d</i> | AB         | 4.29              | A'B'       | 7.41              | A''B''     | 4.34              |
|               | BC         | 6.00              | B'C'       | 5.35              | B''C''     | 10.92             |
|               | CD         | 10.45             | C'D'       | 6.31              | C''D''     | 8.74              |
|               | DO         | 21.46             | D'O'       | 14.97             | D''O''     | 17.71             |
|               | AD''       | 52.60             | A'D        | 44.95             | A''D'      | 44.95             |



**Table S10.** Torsion angles of the internal helix of *rac-1(a)–(d)*

|               | Carbon atoms   | Torsion angles/° | Carbon atoms   | Torsion angles/° | Carbon atoms   | Torsion angles/° |
|---------------|----------------|------------------|----------------|------------------|----------------|------------------|
| <i>rac-1a</i> | C(5-6-9-10)    | 1.65             | C(34-33-30-28) | 4.83             | C(40-39-22-20) | 0.58             |
|               | C(6-9-10-15)   | 14.66            | C(33-30-28-29) | 11.47            | C(39-22-20-21) | 12.78            |
|               | C(9-10-15-16)  | 26.06            | C(30-28-29-14) | 28.08            | C(22-20-21-24) | 27.61            |
|               | C(10-15-16-17) | 20.45            | C(28-29-14-13) | 16.59            | C(20-21-24-25) | 20.85            |
| <i>rac-1b</i> | C(2-4-6-8)     | 0.84             | C(24-22-20-18) | 2.40             | C(36-34-32-30) | 2.39             |
|               | C(4-6-8-9)     | 11.66            | C(22-20-18-14) | 10.52            | C(34-32-30-26) | 15.59            |
|               | C(6-8-9-13)    | 21.58            | C(20-18-14-25) | 22.65            | C(32-30-26-10) | 21.78            |
|               | C(8-9-13-15)   | 19.72            | C(18-14-25-27) | 15.68            | C(30-26-10-11) | 15.73            |
| <i>rac-1c</i> | C(11-10-7-6)   | 2.77             | C(11-10-7-6)   | 2.77             | C(11-10-7-6)   | 2.77             |
|               | C(10-7-6-1)    | 12.58            | C(10-7-6-1)    | 12.58            | C(10-7-6-1)    | 12.58            |
|               | C(7-6-1-2)     | 27.15            | C(7-6-1-2)     | 27.15            | C(7-6-1-2)     | 27.15            |
|               | C(6-1-2-3)     | 20.49            | C(6-1-2-3)     | 20.49            | C(6-1-2-3)     | 20.49            |
| <i>rac-1d</i> | C(11-10-7-6)   | 6.00             | C(23-22-19-18) | 8.51             | C(35-34-31-30) | 0.83             |
|               | C(10-7-6-1)    | 13.39            | C(22-19-18-13) | 21.11            | C(34-31-30-25) | 9.68             |
|               | C(7-6-1-26)    | 24.12            | C(19-18-13-2)  | 26.01            | C(31-30-25-14) | 32.80            |
|               | C(6-1-26-27)   | 25.17            | C(18-13-2-3)   | 14.22            | C(30-25-14-15) | 19.97            |

## 6. References

- [1] J. Suffert, Simple Direct Titration of Organolithium Reagents Using N-Pivaloyl-otoluidine and/or N-pivaloyl-*o*-benzylaniline, *J. Org. Chem.*, 1989, **54**, 509–510.
- [2] G. M. Sheldrick, *SADABS*, University of gottingen: Germany, 1996.
- [3] G. M. Sheldrick, *SHELXTL*, version. 5.1; Bruker analytical X-ray systems, Inc.: Madison, WI, 1997.
